# Supplementary material
Source: publisher figshare collection journal article supplement (https://gsajournals.figshare.com/ndownloader/files/15193463)
Supplement: Supplementary file 1 [file 15193463]

## Sheet: Soma baised genes
Supplementary Table 10: Soma biased genes in T. castaneum ≥ 2 fold
This table represents 939 genes list identified as being Soma biased and has enrich transcripts in the carcass. Red color indicates the D. melanogaster known homologs in T. castaneum .
Male carcass vs Testis				Male carcass vs Ovary				Female carcass vs Testis				Female carcass vs Ovary
																				Carcass (Male & Female) biased genes								Male carcass biased genes			Male carcass biased genes								Female carcass biased genes
																				939 genes has ≥ 2 fold change transcripts in T. castaneum soamtic tissue
Gene	logFC			Gene	logFC			Gene	logFC			Gene	logFC									264 D. melanogaster known homologs						27 common elements in "MC vs T" and "MC vs OV":
TC000043	2.00104			TC000043	2.41633			TC000043	2.06997			TC000043	2.48526							Gene		Gene																	29 common elements in "FC vs T" and "FC vs OV":
TC000067	2.91943			TC000067	4.6658			TC000067	2.66958			TC000067	4.41594							TC000043		TC000043							MC vs Testis			MC vs Ovary		10 D. melanogaster known homologs											4 D. melanogaster known homologs
TC000068	3.12129			TC000068	4.15079			TC000068	2.77846			TC000068	3.80794							TC000067		TC000087						Gene	logFC		Gene	logFC		Gene					FC vs T			FC vs Ov
TC000087	2.09621			TC000087	2.89905			TC000087	2.60356			TC000087	3.4064							TC000068		TC000148						TC002660	2.58833		TC002660	4.39905		TC003122					Gene	logFC		Gene	logFC		Gene
TC000102	6.28042			TC000102	3.99352			TC000102	5.99351			TC000102	3.7066							TC000087		TC000151						TC003122	2.16684		TC003122	2.35598		TC008610					TC000611	2.10781		TC000611	2.10915		TC000611
TC000148	4.25966			TC000148	2.2582			TC000148	4.27697			TC000148	2.27547							TC000102		TC000152						TC004312	3.00259		TC004312	2.7573		TC010151					TC001792	2.20098		TC001792	2.67226		TC014346
TC000151	2.93705			TC000151	3.18387			TC000151	3.07172			TC000151	3.31855							TC000148		TC000153						TC004680	2.42402		TC004680	2.25779		TC010239					TC002083	2.36292		TC002083	2.2598		TC015546
TC000152	3.237			TC000152	5.20867			TC000152	3.26899			TC000152	5.24067							TC000151		TC000247						TC006833	2.48493		TC006833	2.75367		TC012232					TC004431	2.12116		TC004431	2.11229		TC015613
TC000153	3.4411			TC000153	4.7041			TC000153	3.23622			TC000153	4.49921							TC000152		TC000249						TC007032	2.43793		TC007032	2.44274		TC014982					TC005784	2.26839		TC005784	2.47606
TC000165	4.37874			TC000165	2.30676			TC000165	4.72951			TC000165	2.65752							TC000153		TC000282						TC007945	2.09811		TC007945	3.20509		TC015102					TC006189	2.07965		TC006189	2.06983
TC000175	4.85703			TC000175	2.61516			TC000175	5.19177			TC000175	2.9499							TC000165		TC000318						TC008610	2.85166		TC008610	2.18942		TC015700					TC006252	2.1614		TC006252	2.08532
TC000222	3.83823			TC000222	4.44313			TC000222	3.84407			TC000222	4.44897							TC000175		TC000432						TC008611	6.1697		TC008611	5.22733		TC031243					TC006369	2.37323		TC006369	2.12292
TC000247	2.69633			TC000247	2.25486			TC000247	3.12813			TC000247	2.68666							TC000222		TC000444						TC008755	2.72329		TC008755	2.42861		TC033913					TC007916	2.35622		TC007916	2.3365
TC000249	2.07206			TC000249	2.52997			TC000249	2.5933			TC000249	3.05122							TC000247		TC000495						TC008777	3.0515		TC008777	2.20449							TC007950	2.04175		TC007950	2.35153
TC000282	3.09279			TC000282	4.46983			TC000282	3.36577			TC000282	4.74281							TC000249		TC000638						TC010151	8.60768		TC010151	7.50469							TC008043	2.93797		TC008043	2.2361
TC000288	3.22131			TC000288	7.00576			TC000288	2.50978			TC000288	6.29424							TC000282		TC000675						TC010239	2.16484		TC010239	2.96822							TC009439	2.03229		TC009439	2.47604
TC000289	3.30194			TC000289	6.17525			TC000289	2.69216			TC000289	5.56546							TC000288		TC000681						TC011173	3.07835		TC011173	2.88679							TC009844	2.07448		TC009844	2.44773
TC000290	3.96933			TC000290	5.91559			TC000290	3.55636			TC000290	5.50262							TC000289		TC000699						TC012232	2.19426		TC012232	2.77818							TC010364	2.33657		TC010364	2.40905
TC000318	3.28726			TC000318	2.16694			TC000318	3.33442			TC000318	2.21409							TC000290		TC000941						TC013245	2.15047		TC013245	2.00019							TC010496	2.56013		TC010496	2.7589
TC000360	3.64806			TC000360	5.16585			TC000360	3.27166			TC000360	4.78944							TC000318		TC000942						TC014156	2.41661		TC014156	2.43519							TC012551	2.67081		TC012551	2.15725
TC000368	2.26391			TC000368	2.53481			TC000368	3.20801			TC000368	3.47917							TC000360		TC001049						TC014982	5.8811		TC014982	5.40542							TC014346	2.12628		TC014346	2.35781
TC000374	3.31954			TC000374	3.54749			TC000374	3.29464			TC000374	3.52257							TC000368		TC001157						TC015102	2.09183		TC015102	2.03636							TC015546	2.27563		TC015546	2.22884
TC000399	3.26618			TC000399	3.36422			TC000399	4.42013			TC000399	4.51847							TC000374		TC001199						TC015700	4.48952		TC015700	4.40904							TC015613	2.30259		TC015613	2.67746
TC000403	2.55739			TC000403	3.62227			TC000403	2.85364			TC000403	3.91853							TC000399		TC001300						TC030611	2.40365		TC030611	2.72391							TC015635	2.06913		TC015635	2.14726
TC000411	2.08526			TC000411	3.21097			TC000411	2.62			TC000411	3.74573							TC000403		TC001301						TC031243	2.29479		TC031243	2.07309							TC031041	2.08304		TC031041	2.82559
TC000432	4.64128			TC000432	2.4059			TC000432	4.82148			TC000432	2.58608							TC000411		TC001324						TC032756	4.42885		TC032756	2.54564							TC031110	2.23245		TC031110	2.01606
TC000440	4.79117			TC000440	3.87186			TC000440	5.36939			TC000440	4.45007							TC000432		TC001374						TC032819	2.19785		TC032819	3.56144							TC031984	2.44697		TC031984	2.22382
TC000442	5.77912			TC000442	4.66364			TC000442	6.44469			TC000442	5.3292							TC000440		TC002295						TC033642	2.03501		TC033642	2.15741							TC032399	2.11275		TC032399	2.1973
TC000444	2.44444			TC000444	2.71328			TC000444	2.75242			TC000444	3.02127							TC000442		TC002431						TC033913	3.08207		TC033913	3.26846							TC033664	2.70207		TC033664	2.30555
TC000472	4.36432			TC000472	2.80309			TC000472	4.8106			TC000472	3.24933							TC000444		TC002437						TC034966	2.08494		TC034966	3.77152							TC033680	2.69321		TC033680	2.09249
TC000495	2.74665			TC000495	3.74146			TC000495	3.05769			TC000495	4.05251							TC000472		TC002444																	TC034146	2.40326		TC034146	2.17089
TC000511	4.61091			TC000511	3.11867			TC000511	4.33634			TC000511	2.84407							TC000495		TC002445																	TC034167	2.18572		TC034167	2.07592
TC000515	2.76546			TC000515	7.13386			TC000515	2.17481			TC000515	6.54321							TC000511		TC002465																	TC034785	2.68243		TC034785	2.09794
TC000516	3.78432			TC000516	8.36632			TC000516	3.03469			TC000516	7.61671							TC000515		TC002466
TC000517	2.09327			TC000517	3.01003			TC000517	2.53707			TC000517	3.45383							TC000516		TC002467
TC000518	3.06258			TC000518	3.17756			TC000518	2.7109			TC000518	2.82579							TC000517		TC002767
TC000522	3.35085			TC000522	2.42325			TC000522	3.52112			TC000522	2.59352							TC000518		TC003287
TC000523	3.07348			TC000523	3.08122			TC000523	2.85613			TC000523	2.86382							TC000522		TC003288
TC000525	2.32165			TC000525	2.47268			TC000525	2.0264			TC000525	2.1774							TC000523		TC003375
TC000542	2.289			TC000542	2.50279			TC000542	2.51339			TC000542	2.72718							TC000525		TC003378
TC000562	3.75666			TC000562	2.92481			TC000562	4.12703			TC000562	3.29518							TC000542		TC003379
TC000576	3.81553			TC000576	2.75117			TC000576	4.11026			TC000576	3.04591							TC000562		TC003914
TC000581	2.78102			TC000581	4.45963			TC000581	2.17711			TC000581	3.85566							TC000576		TC003991
TC000582	3.17466			TC000582	3.57253			TC000582	2.74474			TC000582	3.14257							TC000581		TC004026
TC000585	2.5572			TC000585	2.01411			TC000585	2.68024			TC000585	2.13715							TC000582		TC004027
TC000638	4.18827			TC000638	5.10109			TC000638	4.11349			TC000638	5.02631							TC000585		TC004430
TC000664	3.69602			TC000664	5.66049			TC000664	3.66681			TC000664	5.63129							TC000638		TC004443
TC000665	3.72147			TC000665	4.96575			TC000665	4.04531			TC000665	5.2896							TC000664		TC004444
TC000666	4.20811			TC000666	5.61665			TC000666	4.12003			TC000666	5.52857							TC000665		TC004502
TC000668	3.44201			TC000668	6.44898			TC000668	4.04313			TC000668	7.05028							TC000666		TC004597
TC000675	2.14983			TC000675	2.21624			TC000675	2.82263			TC000675	2.88907							TC000668		TC004676
TC000681	5.14084			TC000681	5.10715			TC000681	5.03109			TC000681	4.9972							TC000675		TC004818
TC000699	3.30783			TC000699	5.08279			TC000699	2.61182			TC000699	4.38675							TC000681		TC004842
TC000803	3.50471			TC000803	4.57341			TC000803	3.25321			TC000803	4.3219							TC000699		TC004937
TC000818	2.89799			TC000818	3.58283			TC000818	3.26506			TC000818	3.9499							TC000803		TC004940
TC000871	5.73728			TC000871	2.91411			TC000871	6.76971			TC000871	3.94654							TC000818		TC005351
TC000940	3.9123			TC000940	7.77394			TC000940	3.51673			TC000940	7.37841							TC000871		TC005352
TC000941	2.79652			TC000941	3.07174			TC000941	2.83449			TC000941	3.10971							TC000940		TC005533
TC000942	4.18143			TC000942	6.06813			TC000942	4.12108			TC000942	6.00779							TC000941		TC005534
TC001049	6.56479			TC001049	9.5882			TC001049	6.49172			TC001049	9.51514							TC000942		TC005925
TC001059	3.30203			TC001059	2.51724			TC001059	3.43834			TC001059	2.65354							TC001049		TC006100
TC001114	5.10969			TC001114	3.76576			TC001114	5.31332			TC001114	3.96934							TC001059		TC006172
TC001115	6.58752			TC001115	5.07615			TC001115	6.94516			TC001115	5.43377							TC001114		TC006231
TC001116	3.59073			TC001116	3.43142			TC001116	3.40926			TC001116	3.24981							TC001115		TC006232
TC001118	4.35476			TC001118	2.29442			TC001118	4.89952			TC001118	2.83918							TC001116		TC006246
TC001119	5.81509			TC001119	4.8261			TC001119	6.24171			TC001119	5.25271							TC001118		TC006247
TC001120	4.80347			TC001120	2.47554			TC001120	5.26784			TC001120	2.93991							TC001119		TC006441
TC001121	4.76779			TC001121	2.12881			TC001121	5.48119			TC001121	2.84212							TC001120		TC006442
TC001157	2.9197			TC001157	3.8665			TC001157	2.81067			TC001157	3.75745							TC001121		TC006444
TC001160	2.63082			TC001160	5.24992			TC001160	2.20523			TC001160	4.82432							TC001157		TC006445
TC001176	5.55762			TC001176	4.71798			TC001176	5.78503			TC001176	4.94538							TC001160		TC006455
TC001199	3.71668			TC001199	3.2426			TC001199	3.38629			TC001199	2.91217							TC001176		TC006456
TC001222	2.80335			TC001222	4.13527			TC001222	2.17577			TC001222	3.50753							TC001199		TC006493
TC001260	3.32088			TC001260	5.91138			TC001260	2.57742			TC001260	5.16792							TC001222		TC006768
TC001262	4.37981			TC001262	6.2819			TC001262	4.26003			TC001262	6.16212							TC001260		TC006846
TC001300	3.01886			TC001300	3.21369			TC001300	3.66616			TC001300	3.86115							TC001262		TC007099
TC001301	2.73077			TC001301	3.21529			TC001301	3.23275			TC001301	3.71729							TC001300		TC007100
TC001310	3.35724			TC001310	6.411			TC001310	2.87725			TC001310	5.93102							TC001301		TC007136
TC001324	2.92429			TC001324	3.93433			TC001324	3.5605			TC001324	4.57055							TC001310		TC007182
TC001339	3.72094			TC001339	6.59934			TC001339	2.96683			TC001339	5.84522							TC001324		TC007185
TC001357	4.74332			TC001357	3.06095			TC001357	5.29477			TC001357	3.61239							TC001339		TC007189
TC001374	2.4662			TC001374	2.7962			TC001374	2.43877			TC001374	2.76876							TC001357		TC007208
TC001413	2.43553			TC001413	4.24937			TC001413	2.46776			TC001413	4.28164							TC001374		TC007258
TC001414	2.7659			TC001414	4.49144			TC001414	2.75856			TC001414	4.48412							TC001413		TC007311
TC001468	2.54901			TC001468	2.03783			TC001468	2.94245			TC001468	2.43128							TC001414		TC007315
TC001695	6.06339			TC001695	2.95685			TC001695	7.0412			TC001695	3.93441							TC001468		TC007316
TC001698	2.67073			TC001698	2.70985			TC001698	2.89737			TC001698	2.9365							TC001695		TC007317
TC001706	6.18247			TC001706	2.27298			TC001706	6.71229			TC001706	2.80252							TC001698		TC007320
TC001707	5.37488			TC001707	2.25109			TC001707	5.78462			TC001707	2.6606							TC001706		TC007321
TC001751	5.20913			TC001751	3.32877			TC001751	5.566			TC001751	3.68564							TC001707		TC007741
TC001758	5.30811			TC001758	2.12633			TC001758	5.72638			TC001758	2.54452							TC001751		TC007742
TC001775	5.52622			TC001775	2.93746			TC001775	6.13153			TC001775	3.54275							TC001758		TC008357
TC001783	5.96969			TC001783	4.6158			TC001783	6.56198			TC001783	5.20792							TC001775		TC008414
TC001866	4.03371			TC001866	2.79481			TC001866	4.0454			TC001866	2.80648							TC001783		TC008468
TC001919	3.88337			TC001919	2.49206			TC001919	3.52905			TC001919	2.13759							TC001866		TC008504
TC001950	4.20942			TC001950	6.09731			TC001950	3.74233			TC001950	5.63023							TC001919		TC008674
TC001959	3.31103			TC001959	4.73704			TC001959	2.85014			TC001959	4.27613							TC001950		TC008675
TC001978	2.65464			TC001978	2.56412			TC001978	2.457			TC001978	2.36649							TC001959		TC008680
TC002071	2.43062			TC002071	2.99524			TC002071	2.72834			TC002071	3.29296							TC001978		TC008681
TC002081	2.83615			TC002081	4.05469			TC002081	3.13907			TC002081	4.35761							TC002071		TC008684
TC002233	3.72496			TC002233	5.42304			TC002233	2.73287			TC002233	4.43073							TC002081		TC008728
TC002295	3.16434			TC002295	6.07232			TC002295	2.77724			TC002295	5.68522							TC002233		TC009160
TC002311	2.25985			TC002311	2.8576			TC002311	2.285			TC002311	2.88274							TC002295		TC009325
TC002431	3.26866			TC002431	3.26829			TC002431	3.4576			TC002431	3.45723							TC002311		TC009551
TC002435	3.06927			TC002435	6.67395			TC002435	2.88653			TC002435	6.49122							TC002431		TC009580
TC002437	4.01196			TC002437	2.23697			TC002437	4.42637			TC002437	2.65139							TC002435		TC009602
TC002444	5.90382			TC002444	2.95597			TC002444	6.48009			TC002444	3.53223							TC002437		TC009650
TC002445	5.6245			TC002445	2.86693			TC002445	5.86714			TC002445	3.10958							TC002444		TC009654
TC002465	3.54622			TC002465	7.40974			TC002465	3.22558			TC002465	7.08909							TC002445		TC009656
TC002466	3.75107			TC002466	5.82536			TC002466	3.31463			TC002466	5.3889							TC002465		TC009658
TC002467	4.09629			TC002467	6.18355			TC002467	3.90568			TC002467	5.99294							TC002466		TC009659
TC002494	3.0673			TC002494	3.60889			TC002494	3.63196			TC002494	4.17357							TC002467		TC009693
TC002496	5.70886			TC002496	6.02499			TC002496	6.29914			TC002496	6.61527							TC002494		TC010066
TC002581	3.20554			TC002581	4.99593			TC002581	3.07609			TC002581	4.86648							TC002496		TC010067
TC002582	2.93421			TC002582	3.95765			TC002582	2.94576			TC002582	3.9692							TC002581		TC010068
TC002615	2.23096			TC002615	2.26564			TC002615	2.74536			TC002615	2.78013							TC002582		TC010105
TC002616	2.8521			TC002616	2.46807			TC002616	2.8611			TC002616	2.47706							TC002615		TC010353
TC002617	3.82328			TC002617	4.25408			TC002617	4.1401			TC002617	4.5709							TC002616		TC010476
TC002767	2.66328			TC002767	5.35206			TC002767	2.22214			TC002767	4.91092							TC002617		TC010817
TC002804	3.46171			TC002804	3.80635			TC002804	4.56135			TC002804	4.90601							TC002767		TC010825
TC002832	2.04479			TC002832	3.04387			TC002832	2.03058			TC002832	3.02965							TC002804		TC010864
TC002952	3.8192			TC002952	5.66877			TC002952	3.92746			TC002952	5.77703							TC002832		TC010955
TC002954	2.36907			TC002954	5.0223			TC002954	2.55043			TC002954	5.20369							TC002952		TC011211
TC002984	3.36075			TC002984	2.63686			TC002984	4.1096			TC002984	3.38572							TC002954		TC011212
TC003029	2.48749			TC003029	2.34104			TC003029	2.60447			TC003029	2.45803							TC002984		TC011244
TC003040	4.43989			TC003040	5.09588			TC003040	4.51636			TC003040	5.17235							TC003029		TC011461
TC003042	6.03645			TC003042	6.3031			TC003042	6.42078			TC003042	6.68724							TC003040		TC011522
TC003043	4.06121			TC003043	3.8658			TC003043	4.23945			TC003043	4.04402							TC003042		TC011736
TC003044	6.78409			TC003044	9.00383			TC003044	7.31082			TC003044	9.53073							TC003043		TC011769
TC003045	6.38024			TC003045	6.34895			TC003045	6.17106			TC003045	6.13968							TC003044		TC011824
TC003046	3.25088			TC003046	4.15891			TC003046	3.52007			TC003046	4.42816							TC003045		TC011937
TC003053	4.6018			TC003053	4.92001			TC003053	5.39389			TC003053	5.71221							TC003046		TC011942
TC003055	6.41056			TC003055	4.76802			TC003055	6.94152			TC003055	5.29886							TC003053		TC012196
TC003057	6.9414			TC003057	5.08969			TC003057	7.5265			TC003057	5.67392							TC003055		TC012229
TC003058	6.77987			TC003058	8.69392			TC003058	7.4307			TC003058	9.34481							TC003057		TC012269
TC003060	4.73554			TC003060	4.02709			TC003060	5.15508			TC003060	4.44661							TC003058		TC012270
TC003109	2.73753			TC003109	5.08073			TC003109	3.40786			TC003109	5.75108							TC003060		TC012282
TC003230	4.92658			TC003230	2.4209			TC003230	5.37932			TC003230	2.87365							TC003109		TC012283
TC003231	2.89423			TC003231	2.18595			TC003231	2.72604			TC003231	2.01767							TC003230		TC012285
TC003273	2.65728			TC003273	6.018			TC003273	2.60877			TC003273	5.96949							TC003231		TC012289
TC003274	2.37625			TC003274	4.79354			TC003274	2.10918			TC003274	4.52647							TC003273		TC012495
TC003275	3.33711			TC003275	6.08357			TC003275	3.32251			TC003275	6.06897							TC003274		TC012498
TC003287	4.4132			TC003287	2.69141			TC003287	4.59316			TC003287	2.87131							TC003275		TC012499
TC003288	3.71005			TC003288	2.25704			TC003288	3.67248			TC003288	2.21943							TC003287		TC012500
TC003323	2.30885			TC003323	2.46725			TC003323	2.38854			TC003323	2.54693							TC003288		TC012501
TC003375	4.98911			TC003375	4.25415			TC003375	5.23678			TC003375	4.50181							TC003323		TC012503
TC003376	3.72058			TC003376	3.05824			TC003376	4.17402			TC003376	3.51169							TC003375		TC012566
TC003377	2.98265			TC003377	2.80438			TC003377	2.53474			TC003377	2.35639							TC003376		TC012662
TC003378	3.50795			TC003378	4.19862			TC003378	3.78695			TC003378	4.47764							TC003377		TC012702
TC003379	2.56062			TC003379	3.38168			TC003379	2.58784			TC003379	3.40889							TC003378		TC012758
TC003380	6.44682			TC003380	4.76523			TC003380	6.97509			TC003380	5.29337							TC003379		TC012765
TC003381	4.49593			TC003381	3.29742			TC003381	5.24101			TC003381	4.0425							TC003380		TC012829
TC003383	6.02077			TC003383	4.65649			TC003383	6.10137			TC003383	4.73684							TC003381		TC012830
TC003391	2.78567			TC003391	2.60705			TC003391	3.14371			TC003391	2.9651							TC003383		TC013128
TC003417	2.32389			TC003417	2.41669			TC003417	2.31638			TC003417	2.40917							TC003391		TC013133
TC003435	2.83671			TC003435	2.01936			TC003435	3.19286			TC003435	2.37552							TC003417		TC013134
TC003486	3.31731			TC003486	2.14312			TC003486	3.56254			TC003486	2.38835							TC003435		TC013138
TC003508	2.86255			TC003508	3.56064			TC003508	2.10698			TC003508	2.80488							TC003486		TC013280
TC003549	3.09252			TC003549	3.81146			TC003549	3.5403			TC003549	4.25925							TC003508		TC013307
TC003807	2.557			TC003807	3.17102			TC003807	2.16256			TC003807	2.77655							TC003549		TC013322
TC003876	4.09249			TC003876	2.28788			TC003876	4.83071			TC003876	3.0261							TC003807		TC013323
TC003905	3.42255			TC003905	5.27518			TC003905	3.43088			TC003905	5.28351							TC003876		TC013326
TC003914	2.31215			TC003914	3.97663			TC003914	2.56654			TC003914	4.23103							TC003905		TC013410
TC003944	6.70076			TC003944	6.82173			TC003944	7.06195			TC003944	7.18292							TC003914		TC013433
TC003990	5.04761			TC003990	6.33299			TC003990	4.15827			TC003990	5.44359							TC003944		TC013459
TC003991	2.50412			TC003991	2.2069			TC003991	3.02168			TC003991	2.72449							TC003990		TC013525
TC004026	2.18687			TC004026	3.5001			TC004026	2.02054			TC004026	3.33373							TC003991		TC013559
TC004027	3.74179			TC004027	4.78174			TC004027	3.70486			TC004027	4.74482							TC004026		TC013560
TC004028	2.58284			TC004028	4.85644			TC004028	2.67691			TC004028	4.95052							TC004027		TC013561
TC004120	3.09726			TC004120	2.99105			TC004120	2.43041			TC004120	2.32409							TC004028		TC013562
TC004121	2.3134			TC004121	2.31786			TC004121	3.023			TC004121	3.02746							TC004120		TC013653
TC004240	2.17414			TC004240	3.64793			TC004240	2.31764			TC004240	3.79142							TC004121		TC013658
TC004273	3.40938			TC004273	4.43201			TC004273	3.33513			TC004273	4.35776							TC004240		TC013662
TC004430	3.31479			TC004430	2.83589			TC004430	3.43513			TC004430	2.95623							TC004273		TC013765
TC004443	2.53169			TC004443	3.59678			TC004443	2.52111			TC004443	3.5862							TC004430		TC013917
TC004444	2.10929			TC004444	2.26618			TC004444	2.12303			TC004444	2.27991							TC004443		TC013918
TC004452	3.68103			TC004452	4.03347			TC004452	3.53567			TC004452	3.8881							TC004444		TC013997
TC004500	3.6791			TC004500	2.45197			TC004500	3.97954			TC004500	2.75238							TC004452		TC014031
TC004502	2.86359			TC004502	5.26005			TC004502	2.6193			TC004502	5.01576							TC004500		TC014068
TC004592	2.29756			TC004592	2.42105			TC004592	2.70033			TC004592	2.82383							TC004502		TC014078
TC004593	2.4186			TC004593	2.14314			TC004593	2.54197			TC004593	2.26651							TC004592		TC014144
TC004597	2.47232			TC004597	2.35262			TC004597	2.43311			TC004597	2.3134							TC004593		TC014147
TC004599	3.34311			TC004599	3.60522			TC004599	2.6452			TC004599	2.90729							TC004597		TC014229
TC004605	3.22507			TC004605	2.24366			TC004605	3.87822			TC004605	2.89682							TC004599		TC014231
TC004624	2.57662			TC004624	2.10686			TC004624	2.82428			TC004624	2.35452							TC004605		TC014361
TC004640	2.68943			TC004640	2.16318			TC004640	2.991			TC004640	2.46476							TC004624		TC014368
TC004661	3.99311			TC004661	3.48977			TC004661	4.0491			TC004661	3.54575							TC004640		TC014497
TC004676	2.58406			TC004676	2.3605			TC004676	2.59235			TC004676	2.36879							TC004661		TC014609
TC004701	5.84741			TC004701	2.62677			TC004701	6.22284			TC004701	3.00218							TC004676		TC014771
TC004704	2.23644			TC004704	2.10637			TC004704	2.40352			TC004704	2.27348							TC004701		TC015042
TC004705	5.16622			TC004705	3.76025			TC004705	5.05641			TC004705	3.65041							TC004704		TC015130
TC004730	3.52907			TC004730	2.14312			TC004730	3.66005			TC004730	2.2741							TC004705		TC015189
TC004733	5.2589			TC004733	3.03326			TC004733	5.50245			TC004733	3.27675							TC004730		TC015203
TC004818	2.71295			TC004818	2.90494			TC004818	2.80335			TC004818	2.99535							TC004733		TC015237
TC004827	5.32545			TC004827	6.47073			TC004827	6.13324			TC004827	7.27853							TC004818		TC015291
TC004842	3.33009			TC004842	4.41806			TC004842	3.82868			TC004842	4.91665							TC004827		TC015296
TC004846	3.72749			TC004846	2.10028			TC004846	4.1435			TC004846	2.51629							TC004842		TC015341
TC004937	3.08646			TC004937	2.16542			TC004937	3.30237			TC004937	2.38133							TC004846		TC015343
TC004940	2.86224			TC004940	3.50225			TC004940	2.78823			TC004940	3.42823							TC004937		TC015392
TC004953	3.95534			TC004953	3.74517			TC004953	3.77416			TC004953	3.56397							TC004940		TC015598
TC005171	4.9603			TC005171	2.09906			TC005171	5.94821			TC005171	3.08691							TC004953		TC015617
TC005181	4.96575			TC005181	2.32295			TC005181	5.39297			TC005181	2.75016							TC005171		TC015721
TC005190	2.41379			TC005190	3.60621			TC005190	2.99408			TC005190	4.18651							TC005181		TC015779
TC005191	2.44885			TC005191	3.69914			TC005191	2.81109			TC005191	4.06138							TC005190		TC015782
TC005232	2.6055			TC005232	2.60245			TC005232	2.69242			TC005232	2.68937							TC005191		TC015783
TC005351	2.7853			TC005351	2.61936			TC005351	2.53708			TC005351	2.37112							TC005232		TC015844
TC005352	3.0902			TC005352	3.39255			TC005352	2.75334			TC005352	3.05566							TC005351		TC016086
TC005367	3.12109			TC005367	3.50195			TC005367	3.34484			TC005367	3.7257							TC005352		TC016225
TC005399	3.42724			TC005399	2.16326			TC005399	3.84154			TC005399	2.57756							TC005367		TC016299
TC005413	2.59297			TC005413	4.41594			TC005413	2.4645			TC005413	4.28747							TC005399		TC016355
TC005430	2.57427			TC005430	2.52941			TC005430	2.66718			TC005430	2.62231							TC005413		TC016365
TC005431	3.11963			TC005431	3.85599			TC005431	3.48183			TC005431	4.21821							TC005430		TC016372
TC005434	4.46327			TC005434	2.71699			TC005434	4.96896			TC005434	3.2226							TC005431		TC016394
TC005487	3.29044			TC005487	4.42078			TC005487	3.90869			TC005487	5.0392							TC005434		TC030452
TC005532	2.42306			TC005532	3.14008			TC005532	2.62257			TC005532	3.3396							TC005487		TC030882
TC005533	4.06286			TC005533	7.79484			TC005533	4.19756			TC005533	7.9298							TC005532		TC031004
TC005534	4.68245			TC005534	6.58705			TC005534	4.5762			TC005534	6.48079							TC005533		TC031061
TC005549	3.1242			TC005549	5.16599			TC005549	2.68288			TC005549	4.72464							TC005534		TC031133
TC005571	4.2926			TC005571	2.12107			TC005571	4.5675			TC005571	2.39595							TC005549		TC031402
TC005602	4.4132			TC005602	5.38492			TC005602	4.01461			TC005602	4.98633							TC005571		TC031414
TC005605	3.25957			TC005605	5.76916			TC005605	2.68018			TC005605	5.18976							TC005602		TC031442
TC005634	3.53613			TC005634	6.35553			TC005634	3.09391			TC005634	5.91332							TC005605		TC032093
TC005637	4.00728			TC005637	3.49104			TC005637	4.03501			TC005637	3.51874							TC005634		TC032094
TC005652	5.26271			TC005652	4.80408			TC005652	6.08157			TC005652	5.62294							TC005637		TC032113
TC005653	3.10297			TC005653	4.26717			TC005653	2.74987			TC005653	3.91406							TC005652		TC032136
TC005669	2.09782			TC005669	3.61716			TC005669	2.44323			TC005669	3.96257							TC005653		TC032161
TC005685	3.44021			TC005685	3.49127			TC005685	3.62736			TC005685	3.67842							TC005669		TC032223
TC005715	2.83923			TC005715	2.29835			TC005715	3.6363			TC005715	3.09553							TC005685		TC032228
TC005726	3.23523			TC005726	4.48647			TC005726	2.65975			TC005726	3.9109							TC005715		TC032229
TC005727	3.45141			TC005727	4.99875			TC005727	3.08455			TC005727	4.63188							TC005726		TC032295
TC005730	3.56969			TC005730	5.58411			TC005730	3.17503			TC005730	5.18944							TC005727		TC032379
TC005770	2.96881			TC005770	2.39669			TC005770	2.82028			TC005770	2.24815							TC005730		TC032503
TC005795	2.40096			TC005795	4.08635			TC005795	2.90671			TC005795	4.59209							TC005770		TC032509
TC005822	2.64698			TC005822	3.16024			TC005822	2.2017			TC005822	2.71492							TC005795		TC032565
TC005907	3.6887			TC005907	5.10757			TC005907	3.81648			TC005907	5.23539							TC005822		TC032833
TC005925	3.62222			TC005925	5.6943			TC005925	2.76582			TC005925	4.8378							TC005907		TC032845
TC005944	2.82326			TC005944	4.91437			TC005944	2.11768			TC005944	4.20876							TC005925		TC032874
TC005951	2.06353			TC005951	3.38161			TC005951	2.02347			TC005951	3.34155							TC005944		TC032876
TC005953	3.02189			TC005953	5.67709			TC005953	2.7082			TC005953	5.3634							TC005951		TC033085
TC005968	3.49379			TC005968	3.16926			TC005968	3.72308			TC005968	3.39855							TC005953		TC033118
TC006024	2.3097			TC006024	2.20041			TC006024	2.36562			TC006024	2.25633							TC005968		TC033142
TC006033	2.11704			TC006033	2.67548			TC006033	2.44281			TC006033	3.00126							TC006024		TC033228
TC006058	4.45403			TC006058	2.3124			TC006058	4.46432			TC006058	2.32268							TC006033		TC033231
TC006093	3.23884			TC006093	2.94512			TC006093	3.83402			TC006093	3.54035							TC006058		TC033309
TC006100	2.76893			TC006100	4.43711			TC006100	2.62398			TC006100	4.29215							TC006093		TC033316
TC006131	2.72537			TC006131	2.49467			TC006131	2.47902			TC006131	2.24828							TC006100		TC033366
TC006172	2.31675			TC006172	3.07096			TC006172	2.45226			TC006172	3.20647							TC006131		TC033406
TC006181	5.60805			TC006181	3.45658			TC006181	6.09391			TC006181	3.94241							TC006172		TC033461
TC006207	2.2917			TC006207	2.92769			TC006207	2.07032			TC006207	2.7063							TC006181		TC033626
TC006212	2.73076			TC006212	5.02351			TC006212	2.02767			TC006212	4.32037							TC006207		TC033648
TC006230	6.51476			TC006230	6.89871			TC006230	7.05825			TC006230	7.4422							TC006212		TC033688
TC006231	2.14817			TC006231	3.2509			TC006231	2.29413			TC006231	3.39686							TC006230		TC034028
TC006232	2.84917			TC006232	2.20454			TC006232	2.91045			TC006232	2.26582							TC006231		TC034082
TC006241	4.64318			TC006241	2.66279			TC006241	5.01377			TC006241	3.03338							TC006232		TC034093
TC006246	3.66507			TC006246	6.66894			TC006246	3.66474			TC006246	6.66863							TC006241		TC034096
TC006247	3.49324			TC006247	6.44357			TC006247	3.4209			TC006247	6.37127							TC006246		TC034188
TC006336	2.29583			TC006336	3.26225			TC006336	2.69734			TC006336	3.66379							TC006247		TC034240
TC006342	2.68597			TC006342	4.05312			TC006342	3.40535			TC006342	4.7725							TC006336		TC034242
TC006374	2.14766			TC006374	2.27946			TC006374	2.00283			TC006374	2.1346							TC006342		TC034323
TC006386	2.02168			TC006386	3.31004			TC006386	2.159			TC006386	3.44736							TC006374		TC034599
TC006391	2.55559			TC006391	3.6593			TC006391	2.17205			TC006391	3.27573							TC006386		TC034670
TC006400	2.68968			TC006400	4.81135			TC006400	2.11243			TC006400	4.23409							TC006391		TC034688
TC006410	2.45772			TC006410	2.36926			TC006410	2.52353			TC006410	2.43507							TC006400		TC034813
TC006419	4.03419			TC006419	5.61163			TC006419	5.08643			TC006419	6.6639							TC006410		TC034829
TC006430	3.13344			TC006430	4.3514			TC006430	2.81442			TC006430	4.03233							TC006419		TC034895
TC006439	2.24297			TC006439	3.31691			TC006439	2.78042			TC006439	3.85447							TC006430
TC006441	2.86709			TC006441	3.63221			TC006441	3.00878			TC006441	3.7739							TC006439
TC006442	4.23497			TC006442	4.18329			TC006442	3.95543			TC006442	3.9037							TC006441
TC006444	3.11045			TC006444	2.37307			TC006444	3.04705			TC006444	2.30966							TC006442
TC006445	2.74243			TC006445	3.84791			TC006445	3.52273			TC006445	4.62821							TC006444
TC006455	3.41464			TC006455	7.04488			TC006455	2.79804			TC006455	6.42829							TC006445
TC006456	3.91552			TC006456	7.59995			TC006456	3.61153			TC006456	7.29597							TC006455
TC006465	4.17236			TC006465	2.02864			TC006465	5.12109			TC006465	2.97736							TC006456
TC006471	4.36945			TC006471	3.2615			TC006471	4.7131			TC006471	3.60515							TC006465
TC006493	4.64181			TC006493	3.9577			TC006493	4.92803			TC006493	4.24391							TC006471
TC006530	2.52908			TC006530	2.82387			TC006530	2.80544			TC006530	3.10023							TC006493
TC006582	3.76668			TC006582	4.07092			TC006582	3.33733			TC006582	3.64154							TC006530
TC006600	3.61317			TC006600	4.61096			TC006600	3.39391			TC006600	4.39168							TC006582
TC006645	3.11342			TC006645	2.78723			TC006645	2.71345			TC006645	2.38723							TC006600
TC006647	2.95235			TC006647	3.12889			TC006647	2.37747			TC006647	2.554							TC006645
TC006697	4.43381			TC006697	4.56642			TC006697	4.78316			TC006697	4.91576							TC006647
TC006727	5.42948			TC006727	3.06818			TC006727	6.50247			TC006727	4.14117							TC006697
TC006768	3.46418			TC006768	4.07283			TC006768	3.30503			TC006768	3.91366							TC006727
TC006846	6.07859			TC006846	3.28917			TC006846	6.63035			TC006846	3.84093							TC006768
TC006988	4.80096			TC006988	2.70373			TC006988	5.32338			TC006988	3.22614							TC006846
TC006989	4.77219			TC006989	2.57682			TC006989	5.51714			TC006989	3.32175							TC006988
TC007015	5.32378			TC007015	2.03299			TC007015	5.44863			TC007015	2.15784							TC006989
TC007030	3.96482			TC007030	3.87879			TC007030	3.80569			TC007030	3.71966							TC007015
TC007035	2.36724			TC007035	2.60815			TC007035	2.6294			TC007035	2.87032							TC007030
TC007056	3.76896			TC007056	4.56887			TC007056	3.74589			TC007056	4.5458							TC007035
TC007080	6.13604			TC007080	3.76791			TC007080	6.66464			TC007080	4.2965							TC007056
TC007099	3.04622			TC007099	2.67406			TC007099	3.59748			TC007099	3.22533							TC007080
TC007100	2.39204			TC007100	2.79154			TC007100	2.72505			TC007100	3.12456							TC007099
TC007136	5.16022			TC007136	2.16526			TC007136	5.32249			TC007136	2.32753							TC007100
TC007182	4.97433			TC007182	6.70664			TC007182	5.30448			TC007182	7.0368							TC007136
TC007185	2.72665			TC007185	5.50628			TC007185	2.82413			TC007185	5.60379							TC007182
TC007189	3.1673			TC007189	4.85993			TC007189	2.7771			TC007189	4.4697							TC007185
TC007208	2.14998			TC007208	2.35438			TC007208	2.19659			TC007208	2.40099							TC007189
TC007231	6.38923			TC007231	5.2699			TC007231	7.06283			TC007231	5.9435							TC007208
TC007233	4.21301			TC007233	3.02651			TC007233	4.17905			TC007233	2.99252							TC007231
TC007237	3.87087			TC007237	2.70795			TC007237	3.7434			TC007237	2.58045							TC007233
TC007238	6.85219			TC007238	9.29357			TC007238	7.25011			TC007238	9.69149							TC007237
TC007239	4.57995			TC007239	8.39482			TC007239	4.96435			TC007239	8.77927							TC007238
TC007240	6.1987			TC007240	9.10391			TC007240	6.48056			TC007240	9.38578							TC007239
TC007241	6.65845			TC007241	9.05002			TC007241	7.04878			TC007241	9.44036							TC007240
TC007257	2.87025			TC007257	3.01992			TC007257	3.14447			TC007257	3.29416							TC007241
TC007258	4.84028			TC007258	2.79392			TC007258	5.0418			TC007258	2.99544							TC007257
TC007262	6.92887			TC007262	9.22949			TC007262	7.44328			TC007262	9.74391							TC007258
TC007264	2.01286			TC007264	4.06098			TC007264	2.18897			TC007264	4.23712							TC007262
TC007265	6.37268			TC007265	4.24077			TC007265	6.88314			TC007265	4.75115							TC007264
TC007266	6.43299			TC007266	5.57192			TC007266	6.95978			TC007266	6.09851							TC007265
TC007300	4.86306			TC007300	3.76347			TC007300	5.70381			TC007300	4.60421							TC007266
TC007311	4.34543			TC007311	5.11264			TC007311	4.29915			TC007311	5.06634							TC007300
TC007315	3.1952			TC007315	3.56303			TC007315	2.53077			TC007315	2.89854							TC007311
TC007316	3.13715			TC007316	5.21054			TC007316	2.87674			TC007316	4.95013							TC007315
TC007317	2.24169			TC007317	4.37339			TC007317	2.57019			TC007317	4.70191							TC007316
TC007320	4.6986			TC007320	2.66936			TC007320	4.82443			TC007320	2.79515							TC007317
TC007321	3.60809			TC007321	5.62522			TC007321	3.07589			TC007321	5.09301							TC007320
TC007333	3.4921			TC007333	3.0976			TC007333	4.13347			TC007333	3.73898							TC007321
TC007351	2.29618			TC007351	2.87382			TC007351	2.96702			TC007351	3.54467							TC007333
TC007400	4.77954			TC007400	6.43467			TC007400	5.38253			TC007400	7.03769							TC007351
TC007411	5.95599			TC007411	8.99054			TC007411	5.44681			TC007411	8.48138							TC007400
TC007427	5.63302			TC007427	3.78252			TC007427	6.36526			TC007427	4.51474							TC007411
TC007429	2.47965			TC007429	4.51187			TC007429	2.10959			TC007429	4.14181							TC007427
TC007430	3.36598			TC007430	4.90543			TC007430	2.87138			TC007430	4.41083							TC007429
TC007500	4.1619			TC007500	2.03771			TC007500	4.14156			TC007500	2.01732							TC007430
TC007620	2.41505			TC007620	2.39879			TC007620	2.8251			TC007620	2.80888							TC007500
TC007642	2.67636			TC007642	2.06509			TC007642	2.64387			TC007642	2.0326							TC007620
TC007741	4.33968			TC007741	5.43566			TC007741	4.17149			TC007741	5.26742							TC007642
TC007742	6.07424			TC007742	3.92745			TC007742	5.70622			TC007742	3.55877							TC007741
TC007751	2.66473			TC007751	2.23307			TC007751	3.69805			TC007751	3.26647							TC007742
TC007912	3.76027			TC007912	4.90426			TC007912	3.90729			TC007912	5.05129							TC007751
TC007948	2.08566			TC007948	2.99929			TC007948	2.73718			TC007948	3.65086							TC007912
TC007952	2.30398			TC007952	2.74713			TC007952	2.78789			TC007952	3.23109							TC007948
TC007956	3.66498			TC007956	4.23854			TC007956	3.68557			TC007956	4.25911							TC007952
TC007957	3.21425			TC007957	6.51856			TC007957	2.85304			TC007957	6.15736							TC007956
TC007958	4.83662			TC007958	3.69355			TC007958	4.92262			TC007958	3.77954							TC007957
TC008005	3.07216			TC008005	4.17865			TC008005	3.78183			TC008005	4.88862							TC007958
TC008009	3.35594			TC008009	3.08966			TC008009	3.25057			TC008009	2.98424							TC008005
TC008031	6.46338			TC008031	7.56936			TC008031	5.96231			TC008031	7.06828							TC008009
TC008074	3.76023			TC008074	4.29596			TC008074	3.43967			TC008074	3.97532							TC008031
TC008099	4.03558			TC008099	2.71185			TC008099	4.58736			TC008099	3.26364							TC008074
TC008106	5.4279			TC008106	6.78296			TC008106	4.31234			TC008106	5.66718							TC008099
TC008149	3.10393			TC008149	2.99199			TC008149	2.72132			TC008149	2.60924							TC008106
TC008161	4.57439			TC008161	6.59848			TC008161	5.03547			TC008161	7.05968							TC008149
TC008162	5.40249			TC008162	9.20637			TC008162	5.37436			TC008162	9.17827							TC008161
TC008207	6.97466			TC008207	9.27978			TC008207	7.50073			TC008207	9.80586							TC008162
TC008208	6.68151			TC008208	8.41005			TC008208	7.15825			TC008208	8.8868							TC008207
TC008212	6.29609			TC008212	3.94081			TC008212	6.80627			TC008212	4.45099							TC008208
TC008228	6.51256			TC008228	7.88292			TC008228	7.04018			TC008228	8.41055							TC008212
TC008229	7.14758			TC008229	9.20541			TC008229	7.7752			TC008229	9.83302							TC008228
TC008230	6.30325			TC008230	9.15364			TC008230	6.6283			TC008230	9.47869							TC008229
TC008231	6.64347			TC008231	8.10105			TC008231	7.14239			TC008231	8.59997							TC008230
TC008232	6.84892			TC008232	9.29048			TC008232	7.24638			TC008232	9.68795							TC008231
TC008233	4.90991			TC008233	5.92576			TC008233	5.02103			TC008233	6.03687							TC008232
TC008240	4.98497			TC008240	2.18362			TC008240	5.17801			TC008240	2.37666							TC008233
TC008243	2.77909			TC008243	3.44158			TC008243	3.05639			TC008243	3.71888							TC008240
TC008247	3.0625			TC008247	2.61173			TC008247	3.28573			TC008247	2.83497							TC008243
TC008276	2.62919			TC008276	3.46756			TC008276	2.31297			TC008276	3.15134							TC008247
TC008298	4.89901			TC008298	2.23374			TC008298	5.20191			TC008298	2.53664							TC008276
TC008299	2.90724			TC008299	4.80369			TC008299	2.65428			TC008299	4.55073							TC008298
TC008301	3.5788			TC008301	5.31002			TC008301	3.27542			TC008301	5.00662							TC008299
TC008357	2.35449			TC008357	5.79245			TC008357	2.07826			TC008357	5.51623							TC008301
TC008407	4.07813			TC008407	4.60739			TC008407	4.04314			TC008407	4.57241							TC008357
TC008411	4.08785			TC008411	3.06565			TC008411	3.07835			TC008411	2.05605							TC008407
TC008414	2.07549			TC008414	2.19203			TC008414	2.45253			TC008414	2.56912							TC008411
TC008418	2.76085			TC008418	6.22532			TC008418	3.13404			TC008418	6.59851							TC008414
TC008419	6.01269			TC008419	2.43812			TC008419	6.34267			TC008419	2.76789							TC008418
TC008439	2.00881			TC008439	3.3599			TC008439	2.59184			TC008439	3.94294							TC008419
TC008454	2.74173			TC008454	2.44399			TC008454	3.17631			TC008454	2.87858							TC008439
TC008468	4.32962			TC008468	3.19568			TC008468	3.79085			TC008468	2.65666							TC008454
TC008504	2.8104			TC008504	5.99575			TC008504	2.35448			TC008504	5.53983							TC008468
TC008552	5.97908			TC008552	4.14842			TC008552	6.5822			TC008552	4.75151							TC008504
TC008557	5.09233			TC008557	4.03276			TC008557	5.71135			TC008557	4.65177							TC008552
TC008674	4.27553			TC008674	2.55488			TC008674	4.15584			TC008674	2.43518							TC008557
TC008675	2.91041			TC008675	4.0489			TC008675	2.8342			TC008675	3.97269							TC008674
TC008680	3.08304			TC008680	2.58242			TC008680	3.08506			TC008680	2.58443							TC008675
TC008681	5.61028			TC008681	5.93321			TC008681	5.85845			TC008681	6.18137							TC008680
TC008684	3.77798			TC008684	4.31332			TC008684	4.04017			TC008684	4.57552							TC008681
TC008704	2.03108			TC008704	2.41983			TC008704	2.14138			TC008704	2.53014							TC008684
TC008728	2.29143			TC008728	2.28246			TC008728	2.43212			TC008728	2.42315							TC008704
TC008729	2.59376			TC008729	2.57543			TC008729	2.85061			TC008729	2.83228							TC008728
TC008760	3.31314			TC008760	5.48246			TC008760	2.86621			TC008760	5.03553							TC008729
TC008761	2.98736			TC008761	5.39203			TC008761	2.36753			TC008761	4.7722							TC008760
TC008780	2.33237			TC008780	4.87369			TC008780	2.8204			TC008780	5.36173							TC008761
TC008792	4.64706			TC008792	2.70817			TC008792	5.35816			TC008792	3.41925							TC008780
TC009006	6.05309			TC009006	3.19903			TC009006	5.35375			TC009006	2.49965							TC008792
TC009009	4.95785			TC009009	3.67127			TC009009	4.70936			TC009009	3.42276							TC009006
TC009015	2.10406			TC009015	2.68086			TC009015	2.85982			TC009015	3.43664							TC009009
TC009017	4.04986			TC009017	5.15546			TC009017	4.56931			TC009017	5.67494							TC009015
TC009114	2.53845			TC009114	3.58499			TC009114	2.18941			TC009114	3.23592							TC009017
TC009160	3.10298			TC009160	5.73882			TC009160	2.52076			TC009160	5.15658							TC009114
TC009176	3.54386			TC009176	5.03779			TC009176	3.8071			TC009176	5.30103							TC009160
TC009177	2.28492			TC009177	5.22125			TC009177	2.27435			TC009177	5.21068							TC009176
TC009178	3.99834			TC009178	5.61208			TC009178	3.72977			TC009178	5.34349							TC009177
TC009179	3.28474			TC009179	4.87045			TC009179	3.28775			TC009179	4.87347							TC009178
TC009233	3.49173			TC009233	4.99142			TC009233	3.01304			TC009233	4.51272							TC009179
TC009286	2.49671			TC009286	4.79043			TC009286	2.24259			TC009286	4.5363							TC009233
TC009325	2.60834			TC009325	2.29182			TC009325	3.13003			TC009325	2.81352							TC009286
TC009365	3.71328			TC009365	7.75522			TC009365	3.40905			TC009365	7.451							TC009325
TC009442	2.36077			TC009442	3.10095			TC009442	2.72232			TC009442	3.46259							TC009365
TC009452	2.09524			TC009452	2.98748			TC009452	2.37659			TC009452	3.26884							TC009442
TC009501	2.36622			TC009501	2.91232			TC009501	2.36266			TC009501	2.90876							TC009452
TC009532	3.47596			TC009532	2.82822			TC009532	3.80432			TC009532	3.15658							TC009501
TC009551	4.99343			TC009551	4.82311			TC009551	5.62134			TC009551	5.45102							TC009532
TC009580	3.81865			TC009580	6.28868			TC009580	3.48006			TC009580	5.95009							TC009551
TC009602	4.54092			TC009602	5.13167			TC009602	4.59069			TC009602	5.18143							TC009580
TC009626	4.38426			TC009626	5.54353			TC009626	4.34537			TC009626	5.50463							TC009602
TC009627	3.24981			TC009627	5.9206			TC009627	2.9364			TC009627	5.60718							TC009626
TC009629	3.086			TC009629	4.43243			TC009629	3.79813			TC009629	5.14458							TC009627
TC009630	3.63387			TC009630	5.47883			TC009630	3.55767			TC009630	5.40263							TC009629
TC009641	3.1071			TC009641	4.78989			TC009641	3.58245			TC009641	5.26527							TC009630
TC009643	2.42631			TC009643	4.2245			TC009643	2.91639			TC009643	4.71464							TC009641
TC009644	2.02019			TC009644	3.55665			TC009644	2.3212			TC009644	3.85775							TC009643
TC009650	2.61107			TC009650	2.42433			TC009650	2.42664			TC009650	2.23988							TC009644
TC009654	2.40338			TC009654	3.20665			TC009654	2.44019			TC009654	3.24345							TC009650
TC009656	3.12243			TC009656	5.25722			TC009656	2.96855			TC009656	5.10334							TC009654
TC009658	3.41583			TC009658	5.68501			TC009658	3.12244			TC009658	5.39161							TC009656
TC009659	4.05096			TC009659	3.15889			TC009659	4.37742			TC009659	3.48535							TC009658
TC009691	3.18245			TC009691	2.67774			TC009691	3.04948			TC009691	2.54476							TC009659
TC009692	2.07346			TC009692	2.94205			TC009692	2.31037			TC009692	3.17898							TC009691
TC009693	2.69599			TC009693	3.8479			TC009693	2.36056			TC009693	3.51233							TC009692
TC009702	2.59681			TC009702	4.02456			TC009702	2.21833			TC009702	3.64604							TC009693
TC009828	3.46008			TC009828	2.5341			TC009828	4.15223			TC009828	3.2264							TC009702
TC009872	5.29303			TC009872	3.08853			TC009872	5.67667			TC009872	3.47215							TC009828
TC009917	6.09324			TC009917	5.35919			TC009917	6.55965			TC009917	5.82559							TC009872
TC009955	6.16982			TC009955	8.64535			TC009955	6.49691			TC009955	8.97244							TC009917
TC009957	4.66634			TC009957	3.77278			TC009957	5.45182			TC009957	4.55825							TC009955
TC009958	4.52862			TC009958	5.72141			TC009958	5.39132			TC009958	6.58441							TC009957
TC009959	6.07903			TC009959	8.94209			TC009959	6.47889			TC009959	9.34196							TC009958
TC010035	2.9671			TC010035	2.80803			TC010035	2.50805			TC010035	2.34895							TC009959
TC010038	5.74141			TC010038	2.9607			TC010038	6.1484			TC010038	3.36767							TC010035
TC010066	2.01077			TC010066	4.46379			TC010066	2.47704			TC010066	4.93009							TC010038
TC010067	2.52773			TC010067	4.53024			TC010067	2.91079			TC010067	4.91332							TC010066
TC010068	2.68788			TC010068	2.49351			TC010068	2.64092			TC010068	2.44656							TC010067
TC010105	5.0891			TC010105	2.18438			TC010105	4.9696			TC010105	2.06486							TC010068
TC010117	2.49059			TC010117	3.91379			TC010117	2.30224			TC010117	3.72543							TC010105
TC010154	5.07623			TC010154	4.62343			TC010154	5.24126			TC010154	4.7884							TC010117
TC010164	6.42917			TC010164	8.49827			TC010164	6.86685			TC010164	8.93595							TC010154
TC010195	2.87833			TC010195	2.35236			TC010195	3.66083			TC010195	3.13486							TC010164
TC010318	2.10378			TC010318	2.58569			TC010318	2.72192			TC010318	3.20383							TC010195
TC010331	2.50642			TC010331	2.35343			TC010331	2.53373			TC010331	2.38073							TC010318
TC010353	2.79995			TC010353	5.84915			TC010353	2.4747			TC010353	5.5239							TC010331
TC010419	3.95033			TC010419	2.22113			TC010419	4.34064			TC010419	2.61144							TC010353
TC010422	7.14386			TC010422	7.32677			TC010422	7.16657			TC010422	7.34948							TC010419
TC010476	6.44306			TC010476	8.06319			TC010476	6.22521			TC010476	7.84534							TC010422
TC010507	2.47824			TC010507	2.33266			TC010507	2.21067			TC010507	2.06506							TC010476
TC010564	3.7425			TC010564	3.89382			TC010564	3.99912			TC010564	4.15044							TC010507
TC010587	2.28105			TC010587	2.11376			TC010587	2.41097			TC010587	2.24369							TC010564
TC010646	3.58551			TC010646	2.8355			TC010646	3.30559			TC010646	2.55557							TC010587
TC010653	4.25256			TC010653	2.17136			TC010653	4.77705			TC010653	2.69585							TC010646
TC010815	5.88843			TC010815	2.66897			TC010815	6.13222			TC010815	2.91267							TC010653
TC010817	4.02961			TC010817	4.71945			TC010817	3.80829			TC010817	4.49812							TC010815
TC010825	5.87985			TC010825	3.91936			TC010825	6.42487			TC010825	4.46436							TC010817
TC010829	3.56555			TC010829	4.77798			TC010829	3.41858			TC010829	4.631							TC010825
TC010864	2.00645			TC010864	3.54602			TC010864	2.29013			TC010864	3.82971							TC010829
TC010955	2.95094			TC010955	3.45659			TC010955	3.14526			TC010955	3.65091							TC010864
TC011000	4.61755			TC011000	5.80004			TC011000	4.4222			TC011000	5.6047							TC010955
TC011068	6.01336			TC011068	2.50193			TC011068	6.65344			TC011068	3.142							TC011000
TC011074	4.02021			TC011074	2.94364			TC011074	4.21986			TC011074	3.14328							TC011068
TC011075	3.54015			TC011075	2.6568			TC011075	3.50969			TC011075	2.62634							TC011074
TC011099	2.84615			TC011099	3.6857			TC011099	3.47359			TC011099	4.31314							TC011075
TC011139	5.13117			TC011139	2.25189			TC011139	5.58271			TC011139	2.70343							TC011099
TC011142	4.94714			TC011142	3.38257			TC011142	5.50495			TC011142	3.94038							TC011139
TC011151	2.52854			TC011151	2.88497			TC011151	2.9713			TC011151	3.32776							TC011142
TC011211	2.26931			TC011211	3.43453			TC011211	2.55527			TC011211	3.7205							TC011151
TC011212	6.25707			TC011212	6.61137			TC011212	6.69084			TC011212	7.04513							TC011211
TC011236	3.81783			TC011236	4.01458			TC011236	4.4873			TC011236	4.68413							TC011212
TC011237	5.47291			TC011237	2.37762			TC011237	5.93843			TC011237	2.84303							TC011236
TC011244	2.61661			TC011244	2.53357			TC011244	3.08858			TC011244	3.00555							TC011237
TC011318	2.45417			TC011318	2.4995			TC011318	2.91012			TC011318	2.9555							TC011244
TC011338	6.65331			TC011338	8.3208			TC011338	7.25151			TC011338	8.91901							TC011318
TC011376	2.48718			TC011376	5.0479			TC011376	2.27306			TC011376	4.83378							TC011338
TC011413	2.5755			TC011413	2.20839			TC011413	3.3845			TC011413	3.01748							TC011376
TC011414	4.57305			TC011414	2.97052			TC011414	5.38845			TC011414	3.78591							TC011413
TC011432	2.57656			TC011432	4.57632			TC011432	2.35009			TC011432	4.34983							TC011414
TC011461	5.85614			TC011461	2.66043			TC011461	6.08238			TC011461	2.88667							TC011432
TC011522	2.48923			TC011522	3.6575			TC011522	2.93357			TC011522	4.10184							TC011461
TC011528	2.25836			TC011528	3.82547			TC011528	2.49884			TC011528	4.06596							TC011522
TC011564	2.75996			TC011564	7.59872			TC011564	2.08706			TC011564	6.92583							TC011528
TC011630	2.65759			TC011630	2.32129			TC011630	2.87976			TC011630	2.54347							TC011564
TC011671	3.41376			TC011671	2.19329			TC011671	3.55483			TC011671	2.33435							TC011630
TC011675	2.26788			TC011675	2.408			TC011675	2.29976			TC011675	2.43988							TC011671
TC011676	3.18728			TC011676	2.26125			TC011676	3.47268			TC011676	2.54666							TC011675
TC011703	3.39194			TC011703	5.74819			TC011703	2.99384			TC011703	5.3501							TC011676
TC011712	2.70905			TC011712	2.31001			TC011712	3.14563			TC011712	2.74659							TC011703
TC011724	2.80239			TC011724	2.52105			TC011724	3.29367			TC011724	3.01234							TC011712
TC011736	5.45817			TC011736	5.58144			TC011736	6.06769			TC011736	6.19095							TC011724
TC011760	3.33359			TC011760	4.46168			TC011760	3.45982			TC011760	4.58791							TC011736
TC011769	6.04768			TC011769	3.01758			TC011769	6.26147			TC011769	3.23136							TC011760
TC011824	4.10097			TC011824	5.66275			TC011824	3.47568			TC011824	5.03746							TC011769
TC011835	5.50099			TC011835	3.53588			TC011835	6.20458			TC011835	4.23941							TC011824
TC011937	2.03135			TC011937	2.47837			TC011937	2.31754			TC011937	2.76456							TC011835
TC011942	4.36689			TC011942	2.41942			TC011942	4.70432			TC011942	2.75682							TC011937
TC011976	4.83008			TC011976	3.37595			TC011976	5.51209			TC011976	4.05796							TC011942
TC012078	2.11265			TC012078	4.21521			TC012078	2.68345			TC012078	4.78603							TC011976
TC012131	2.60138			TC012131	2.60922			TC012131	3.1796			TC012131	3.18746							TC012078
TC012154	3.62848			TC012154	2.62746			TC012154	3.69921			TC012154	2.69819							TC012131
TC012163	2.76415			TC012163	2.90491			TC012163	2.85059			TC012163	2.99136							TC012154
TC012169	4.16149			TC012169	3.82166			TC012169	4.70653			TC012169	4.3667							TC012163
TC012170	2.7218			TC012170	4.48635			TC012170	2.18544			TC012170	3.94996							TC012169
TC012171	5.10656			TC012171	2.29734			TC012171	5.29836			TC012171	2.48909							TC012170
TC012177	2.24019			TC012177	3.83466			TC012177	2.46508			TC012177	4.05954							TC012171
TC012178	2.30999			TC012178	3.98515			TC012178	2.44662			TC012178	4.12178							TC012177
TC012181	3.66392			TC012181	3.89708			TC012181	4.31574			TC012181	4.54892							TC012178
TC012183	2.88203			TC012183	2.82508			TC012183	2.82218			TC012183	2.76523							TC012181
TC012189	2.54838			TC012189	5.30736			TC012189	2.58272			TC012189	5.34171							TC012183
TC012196	4.85393			TC012196	3.91468			TC012196	4.72041			TC012196	3.78116							TC012189
TC012229	3.40534			TC012229	3.69488			TC012229	3.38163			TC012229	3.67116							TC012196
TC012241	2.66894			TC012241	3.6652			TC012241	2.94546			TC012241	3.94173							TC012229
TC012269	6.30279			TC012269	5.79522			TC012269	6.42815			TC012269	5.92054							TC012241
TC012270	6.76474			TC012270	7.7899			TC012270	6.67057			TC012270	7.69572							TC012269
TC012282	3.21707			TC012282	4.03221			TC012282	3.29731			TC012282	4.11245							TC012270
TC012283	2.06252			TC012283	3.45115			TC012283	2.67275			TC012283	4.06141							TC012282
TC012285	2.53647			TC012285	2.23242			TC012285	2.68865			TC012285	2.3846							TC012283
TC012289	3.80155			TC012289	3.90515			TC012289	4.29891			TC012289	4.40251							TC012285
TC012385	4.043			TC012385	2.08858			TC012385	4.30807			TC012385	2.35358							TC012289
TC012386	4.28526			TC012386	2.25338			TC012386	4.78015			TC012386	2.74822							TC012385
TC012390	2.83146			TC012390	2.33839			TC012390	3.54505			TC012390	3.05198							TC012386
TC012469	5.33538			TC012469	5.23486			TC012469	4.7825			TC012469	4.68158							TC012390
TC012495	2.11373			TC012495	2.95493			TC012495	2.19027			TC012495	3.03149							TC012469
TC012498	2.20523			TC012498	2.95786			TC012498	2.46364			TC012498	3.21628							TC012495
TC012499	2.71886			TC012499	2.77776			TC012499	3.10364			TC012499	3.16254							TC012498
TC012500	2.32738			TC012500	3.30778			TC012500	2.97352			TC012500	3.95392							TC012499
TC012501	2.53521			TC012501	3.55356			TC012501	2.63638			TC012501	3.65474							TC012500
TC012503	2.53666			TC012503	3.53529			TC012503	2.14834			TC012503	3.14696							TC012501
TC012516	4.9597			TC012516	2.83882			TC012516	5.74745			TC012516	3.62652							TC012503
TC012546	2.84271			TC012546	5.12061			TC012546	2.54371			TC012546	4.82159							TC012516
TC012566	2.74064			TC012566	4.52107			TC012566	2.62311			TC012566	4.40354							TC012546
TC012616	3.51102			TC012616	2.04963			TC012616	4.16116			TC012616	2.69977							TC012566
TC012662	3.47742			TC012662	2.96311			TC012662	3.84866			TC012662	3.33436							TC012616
TC012670	5.47784			TC012670	3.23271			TC012670	6.17895			TC012670	3.93376							TC012662
TC012671	2.67764			TC012671	2.19038			TC012671	3.16295			TC012671	2.67569							TC012670
TC012702	5.10816			TC012702	5.9115			TC012702	5.26675			TC012702	6.07008							TC012671
TC012717	2.91341			TC012717	2.66135			TC012717	3.3864			TC012717	3.13436							TC012702
TC012758	2.53749			TC012758	2.88638			TC012758	3.00894			TC012758	3.35784							TC012717
TC012765	2.20706			TC012765	2.47859			TC012765	2.57136			TC012765	2.84293							TC012758
TC012785	3.72029			TC012785	3.7066			TC012785	3.54643			TC012785	3.53272							TC012765
TC012826	2.44397			TC012826	3.3537			TC012826	2.62072			TC012826	3.53045							TC012785
TC012827	2.32267			TC012827	3.42454			TC012827	2.48961			TC012827	3.59149							TC012826
TC012828	5.02626			TC012828	5.58457			TC012828	5.43604			TC012828	5.99435							TC012827
TC012829	6.09571			TC012829	4.49182			TC012829	6.35702			TC012829	4.7531							TC012828
TC012830	2.83944			TC012830	3.87961			TC012830	3.20672			TC012830	4.24691							TC012829
TC012838	2.98501			TC012838	5.96475			TC012838	2.95205			TC012838	5.93181							TC012830
TC012839	2.43744			TC012839	3.65836			TC012839	2.01993			TC012839	3.2408							TC012838
TC012840	2.47966			TC012840	4.02191			TC012840	2.67003			TC012840	4.21231							TC012839
TC012841	2.39827			TC012841	4.39265			TC012841	2.74929			TC012841	4.74381							TC012840
TC012864	3.99731			TC012864	2.90509			TC012864	3.64939			TC012864	2.55713							TC012841
TC012937	2.82288			TC012937	3.22233			TC012937	3.14377			TC012937	3.54329							TC012864
TC012938	2.9784			TC012938	2.92186			TC012938	3.27921			TC012938	3.22272							TC012937
TC012939	2.98862			TC012939	3.39185			TC012939	3.31834			TC012939	3.72164							TC012938
TC012997	3.88842			TC012997	2.62202			TC012997	4.47105			TC012997	3.20466							TC012939
TC013059	2.60628			TC013059	2.38438			TC013059	2.84887			TC013059	2.62697							TC012997
TC013128	5.45921			TC013128	3.54532			TC013128	5.7138			TC013128	3.79985							TC013059
TC013133	3.54251			TC013133	5.87888			TC013133	4.08771			TC013133	6.42412							TC013128
TC013134	5.02626			TC013134	6.61656			TC013134	5.32361			TC013134	6.91394							TC013133
TC013138	4.76583			TC013138	4.12825			TC013138	5.03768			TC013138	4.40008							TC013134
TC013141	4.84842			TC013141	2.2423			TC013141	5.63046			TC013141	3.02425							TC013138
TC013144	3.4011			TC013144	7.21767			TC013144	3.27192			TC013144	7.08882							TC013141
TC013174	2.9904			TC013174	2.40184			TC013174	3.35213			TC013174	2.7636							TC013144
TC013214	3.94514			TC013214	3.03641			TC013214	4.36045			TC013214	3.45172							TC013174
TC013280	3.08625			TC013280	2.681			TC013280	3.23422			TC013280	2.82898							TC013214
TC013307	3.74998			TC013307	4.06593			TC013307	4.17628			TC013307	4.49223							TC013280
TC013319	2.30701			TC013319	3.4272			TC013319	2.7102			TC013319	3.83042							TC013307
TC013322	4.07992			TC013322	4.77988			TC013322	4.11607			TC013322	4.81601							TC013319
TC013323	4.72082			TC013323	2.6955			TC013323	4.78039			TC013323	2.75491							TC013322
TC013326	2.28453			TC013326	2.82191			TC013326	2.44926			TC013326	2.98664							TC013323
TC013401	6.25646			TC013401	7.23287			TC013401	6.83651			TC013401	7.81293							TC013326
TC013410	3.21757			TC013410	3.10024			TC013410	3.06496			TC013410	2.94761							TC013401
TC013419	4.32122			TC013419	3.0816			TC013419	4.4471			TC013419	3.20744							TC013410
TC013433	2.62548			TC013433	3.04839			TC013433	3.02795			TC013433	3.45086							TC013419
TC013448	5.63172			TC013448	3.52081			TC013448	6.05139			TC013448	3.94046							TC013433
TC013459	2.36715			TC013459	2.53244			TC013459	2.48341			TC013459	2.6487							TC013448
TC013480	4.32657			TC013480	5.61939			TC013480	4.86566			TC013480	6.15848							TC013459
TC013525	3.24954			TC013525	4.81347			TC013525	2.83795			TC013525	4.40186							TC013480
TC013543	2.29782			TC013543	2.22108			TC013543	2.51475			TC013543	2.43801							TC013525
TC013544	2.10032			TC013544	2.48712			TC013544	2.00975			TC013544	2.39653							TC013543
TC013559	4.43142			TC013559	3.29351			TC013559	4.72478			TC013559	3.58686							TC013544
TC013560	3.19699			TC013560	2.12506			TC013560	3.7374			TC013560	2.66558							TC013559
TC013561	4.53303			TC013561	5.22132			TC013561	4.54818			TC013561	5.23642							TC013560
TC013562	3.61579			TC013562	2.12064			TC013562	3.78614			TC013562	2.29099							TC013561
TC013580	4.54252			TC013580	2.08026			TC013580	5.07987			TC013580	2.61761							TC013562
TC013581	3.18519			TC013581	4.97779			TC013581	2.68343			TC013581	4.476							TC013580
TC013617	4.64765			TC013617	2.48122			TC013617	5.46315			TC013617	3.29671							TC013581
TC013627	5.36032			TC013627	2.15698			TC013627	5.62017			TC013627	2.41682							TC013617
TC013635	2.41198			TC013635	3.68023			TC013635	2.94254			TC013635	4.21079							TC013627
TC013653	4.14756			TC013653	4.39791			TC013653	3.03429			TC013653	3.28433							TC013635
TC013658	4.4155			TC013658	2.2191			TC013658	4.66942			TC013658	2.47299							TC013653
TC013662	3.94826			TC013662	5.55511			TC013662	3.8895			TC013662	5.49635							TC013658
TC013742	3.66954			TC013742	3.79173			TC013742	3.75295			TC013742	3.87514							TC013662
TC013757	5.54955			TC013757	3.92416			TC013757	4.81246			TC013757	3.18701							TC013742
TC013765	5.92635			TC013765	4.87641			TC013765	6.60389			TC013765	5.55394							TC013757
TC013811	4.26866			TC013811	3.76372			TC013811	4.66689			TC013811	4.16195							TC013765
TC013816	3.80252			TC013816	6.00509			TC013816	4.55462			TC013816	6.75739							TC013811
TC013827	7.59048			TC013827	6.60445			TC013827	8.11756			TC013827	7.13096							TC013816
TC013857	2.89138			TC013857	2.32554			TC013857	3.43251			TC013857	2.86668							TC013827
TC013917	2.12916			TC013917	2.20837			TC013917	2.42788			TC013917	2.5071							TC013857
TC013918	2.30426			TC013918	2.24318			TC013918	2.47439			TC013918	2.41331							TC013917
TC013967	5.32912			TC013967	6.00125			TC013967	5.35891			TC013967	6.03104							TC013918
TC013997	3.13858			TC013997	3.39627			TC013997	3.66884			TC013997	3.92654							TC013967
TC014031	2.894			TC014031	2.12112			TC014031	3.08806			TC014031	2.31518							TC013997
TC014068	3.17436			TC014068	3.2988			TC014068	2.67262			TC014068	2.79683							TC014031
TC014078	3.0688			TC014078	3.44595			TC014078	2.63559			TC014078	3.01271							TC014068
TC014080	2.46106			TC014080	2.38708			TC014080	2.30626			TC014080	2.23226							TC014078
TC014093	2.20952			TC014093	2.55819			TC014093	2.11036			TC014093	2.45903							TC014080
TC014095	2.25392			TC014095	2.96618			TC014095	2.06967			TC014095	2.78192							TC014093
TC014099	3.424			TC014099	2.7582			TC014099	3.14475			TC014099	2.47891							TC014095
TC014100	5.90625			TC014100	3.47558			TC014100	6.52254			TC014100	4.09187							TC014099
TC014101	6.11693			TC014101	4.42069			TC014101	6.76824			TC014101	5.07199							TC014100
TC014144	2.92998			TC014144	3.27301			TC014144	2.68419			TC014144	3.02718							TC014101
TC014147	3.70261			TC014147	6.18912			TC014147	3.51671			TC014147	6.00323							TC014144
TC014154	2.66741			TC014154	3.30672			TC014154	2.73508			TC014154	3.37439							TC014147
TC014157	2.93157			TC014157	2.33438			TC014157	3.08074			TC014157	2.48355							TC014154
TC014206	2.4499			TC014206	4.58629			TC014206	2.13262			TC014206	4.26898							TC014157
TC014227	4.51233			TC014227	2.20298			TC014227	4.83985			TC014227	2.53048							TC014206
TC014229	2.73728			TC014229	4.27689			TC014229	3.224			TC014229	4.76362							TC014227
TC014231	2.24539			TC014231	3.70801			TC014231	2.87736			TC014231	4.34013							TC014229
TC014316	5.88539			TC014316	2.28111			TC014316	6.40884			TC014316	2.80451							TC014231
TC014345	5.87013			TC014345	3.13347			TC014345	6.6097			TC014345	3.87304							TC014316
TC014347	4.96386			TC014347	3.93491			TC014347	5.00861			TC014347	3.97958							TC014345
TC014361	3.14425			TC014361	4.5127			TC014361	3.63478			TC014361	5.00327							TC014347
TC014368	2.54092			TC014368	2.17688			TC014368	2.52648			TC014368	2.16244							TC014361
TC014389	2.59518			TC014389	2.1602			TC014389	2.65371			TC014389	2.21873							TC014368
TC014422	4.42469			TC014422	2.11147			TC014422	4.98331			TC014422	2.67008							TC014389
TC014497	4.22183			TC014497	3.74329			TC014497	4.58353			TC014497	4.10498							TC014422
TC014517	4.18894			TC014517	2.24839			TC014517	4.71035			TC014517	2.76979							TC014497
TC014538	5.62298			TC014538	4.15737			TC014538	6.45733			TC014538	4.99172							TC014517
TC014590	2.97778			TC014590	2.37764			TC014590	3.37005			TC014590	2.76991							TC014538
TC014609	2.19327			TC014609	3.21454			TC014609	2.2874			TC014609	3.30867							TC014590
TC014634	5.55331			TC014634	4.44899			TC014634	6.27422			TC014634	5.16989							TC014609
TC014637	4.02387			TC014637	2.90858			TC014637	4.70946			TC014637	3.59418							TC014634
TC014687	2.15252			TC014687	3.69831			TC014687	2.02309			TC014687	3.56887							TC014637
TC014727	3.14041			TC014727	3.13405			TC014727	2.57811			TC014727	2.57175							TC014687
TC014771	2.89956			TC014771	4.79567			TC014771	3.16415			TC014771	5.06028							TC014727
TC014783	2.50288			TC014783	4.27287			TC014783	3.24854			TC014783	5.01856							TC014771
TC014879	3.26224			TC014879	4.99398			TC014879	2.95979			TC014879	4.69153							TC014783
TC014880	2.80202			TC014880	2.08438			TC014880	3.41701			TC014880	2.69938							TC014879
TC014907	2.81853			TC014907	3.57965			TC014907	2.99855			TC014907	3.75967							TC014880
TC015040	3.08124			TC015040	3.13295			TC015040	3.08426			TC015040	3.13595							TC014907
TC015042	2.24494			TC015042	4.25596			TC015042	2.43301			TC015042	4.4441							TC015040
TC015130	2.67717			TC015130	5.12749			TC015130	2.37909			TC015130	4.82941							TC015042
TC015155	2.1304			TC015155	3.19772			TC015155	2.50992			TC015155	3.57727							TC015130
TC015182	3.932			TC015182	2.6053			TC015182	3.92338			TC015182	2.59666							TC015155
TC015189	4.62659			TC015189	4.01139			TC015189	4.7895			TC015189	4.1743							TC015182
TC015203	2.63106			TC015203	3.11543			TC015203	2.19442			TC015203	2.67875							TC015189
TC015208	4.76333			TC015208	2.50964			TC015208	5.11245			TC015208	2.85863							TC015203
TC015236	3.90701			TC015236	3.47225			TC015236	4.87832			TC015236	4.44358							TC015208
TC015237	3.60196			TC015237	6.26237			TC015237	3.22886			TC015237	5.88927							TC015236
TC015238	6.3566			TC015238	5.54967			TC015238	6.79886			TC015238	5.99192							TC015237
TC015284	2.73821			TC015284	5.02101			TC015284	2.34474			TC015284	4.62754							TC015238
TC015285	2.34778			TC015285	4.25206			TC015285	2.12088			TC015285	4.02514							TC015284
TC015291	3.23904			TC015291	6.17759			TC015291	3.04588			TC015291	5.9845							TC015285
TC015296	5.30574			TC015296	6.81662			TC015296	5.88541			TC015296	7.39631							TC015291
TC015304	2.22218			TC015304	2.3759			TC015304	2.39694			TC015304	2.55066							TC015296
TC015315	3.12405			TC015315	2.51232			TC015315	3.39556			TC015315	2.78383							TC015304
TC015322	3.02137			TC015322	2.35206			TC015322	3.19866			TC015322	2.52935							TC015315
TC015325	2.99142			TC015325	4.18575			TC015325	3.80662			TC015325	5.00095							TC015322
TC015341	5.17428			TC015341	3.04579			TC015341	5.56599			TC015341	3.43741							TC015325
TC015343	3.04912			TC015343	3.22569			TC015343	3.35325			TC015343	3.52984							TC015341
TC015385	2.03339			TC015385	2.34747			TC015385	2.11559			TC015385	2.42967							TC015343
TC015392	2.79809			TC015392	2.58958			TC015392	2.90675			TC015392	2.69824							TC015385
TC015405	2.73596			TC015405	4.36963			TC015405	3.24294			TC015405	4.87664							TC015392
TC015406	3.81251			TC015406	2.77196			TC015406	4.01945			TC015406	2.97888							TC015405
TC015446	2.93239			TC015446	3.24929			TC015446	3.23713			TC015446	3.55405							TC015406
TC015464	3.80202			TC015464	3.02956			TC015464	4.16143			TC015464	3.38896							TC015446
TC015481	4.71713			TC015481	3.8926			TC015481	5.38779			TC015481	4.56325							TC015464
TC015492	3.81422			TC015492	3.89024			TC015492	4.42123			TC015492	4.49727							TC015481
TC015531	2.7383			TC015531	2.26516			TC015531	2.82279			TC015531	2.34965							TC015492
TC015564	5.78386			TC015564	6.51556			TC015564	5.90426			TC015564	6.63596							TC015531
TC015590	5.12492			TC015590	2.2189			TC015590	5.22987			TC015590	2.32377							TC015564
TC015595	5.39238			TC015595	4.37492			TC015595	5.56319			TC015595	4.54572							TC015590
TC015598	4.85323			TC015598	4.01074			TC015598	5.36583			TC015598	4.52334							TC015595
TC015612	2.35452			TC015612	2.28388			TC015612	3.28774			TC015612	3.21724							TC015598
TC015614	2.749			TC015614	3.78981			TC015614	2.7633			TC015614	3.8041							TC015612
TC015617	2.88032			TC015617	3.78833			TC015617	2.41629			TC015617	3.32412							TC015614
TC015618	3.80018			TC015618	6.89265			TC015618	3.15104			TC015618	6.24351							TC015617
TC015620	7.71996			TC015620	7.4624			TC015620	8.02856			TC015620	7.77092							TC015618
TC015689	2.83978			TC015689	2.23383			TC015689	2.81018			TC015689	2.20421							TC015620
TC015721	5.8519			TC015721	5.82273			TC015721	6.53283			TC015721	6.50365							TC015689
TC015779	3.75441			TC015779	5.52603			TC015779	3.50306			TC015779	5.27467							TC015721
TC015782	4.55886			TC015782	4.86744			TC015782	4.50012			TC015782	4.80869							TC015779
TC015783	4.31425			TC015783	5.56323			TC015783	4.26961			TC015783	5.51859							TC015782
TC015784	2.68842			TC015784	3.12467			TC015784	2.39291			TC015784	2.82908							TC015783
TC015844	5.44363			TC015844	3.91393			TC015844	5.74057			TC015844	4.21078							TC015784
TC015923	2.73619			TC015923	2.49062			TC015923	3.00581			TC015923	2.76025							TC015844
TC015927	3.0041			TC015927	2.52955			TC015927	3.41581			TC015927	2.94126							TC015923
TC016086	4.24493			TC016086	4.7253			TC016086	4.44005			TC016086	4.9204							TC015927
TC016203	2.59599			TC016203	2.62872			TC016203	3.07264			TC016203	3.10537							TC016086
TC016225	2.57823			TC016225	2.57911			TC016225	2.79418			TC016225	2.79506							TC016203
TC016299	2.05859			TC016299	2.71148			TC016299	2.48847			TC016299	3.14138							TC016225
TC016303	2.15544			TC016303	2.35766			TC016303	2.47362			TC016303	2.67585							TC016299
TC016347	3.20315			TC016347	5.66634			TC016347	3.01772			TC016347	5.48092							TC016303
TC016348	3.42754			TC016348	5.95598			TC016348	3.05102			TC016348	5.57947							TC016347
TC016350	2.74925			TC016350	6.24918			TC016350	2.03812			TC016350	5.53805							TC016348
TC016355	2.99511			TC016355	3.04067			TC016355	2.84036			TC016355	2.88591							TC016350
TC016365	3.26014			TC016365	3.89511			TC016365	2.96565			TC016365	3.60061							TC016355
TC016372	4.46122			TC016372	6.88887			TC016372	4.03732			TC016372	6.46498							TC016365
TC016390	2.87969			TC016390	3.42065			TC016390	3.76683			TC016390	4.30781							TC016372
TC016394	2.34876			TC016394	2.08646			TC016394	3.35739			TC016394	3.09527							TC016390
TC016395	5.47409			TC016395	8.49176			TC016395	5.53159			TC016395	8.54939							TC016394
TC030022	2.02675			TC030022	2.0566			TC030022	2.07209			TC030022	2.10194							TC016395
TC030452	2.22654			TC030452	4.38504			TC030452	2.12024			TC030452	4.27875							TC030022
TC030606	3.28232			TC030606	3.35109			TC030606	3.05294			TC030606	3.12167							TC030452
TC030608	2.18703			TC030608	2.0089			TC030608	2.58671			TC030608	2.40858							TC030606
TC030752	6.40117			TC030752	3.34863			TC030752	7.39576			TC030752	4.34306							TC030608
TC030754	3.11991			TC030754	2.37729			TC030754	3.72586			TC030754	2.98325							TC030752
TC030780	2.05142			TC030780	2.57148			TC030780	2.0683			TC030780	2.58836							TC030754
TC030882	4.60342			TC030882	3.10077			TC030882	4.67065			TC030882	3.168							TC030780
TC030899	2.04814			TC030899	2.00872			TC030899	2.14748			TC030899	2.10806							TC030882
TC030911	2.68015			TC030911	2.30045			TC030911	2.60709			TC030911	2.22737							TC030899
TC030987	4.15874			TC030987	2.29409			TC030987	4.91178			TC030987	3.04717							TC030911
TC031004	3.54265			TC031004	5.3518			TC031004	3.1706			TC031004	4.97974							TC030987
TC031061	2.38227			TC031061	3.64079			TC031061	2.69004			TC031061	3.94858							TC031004
TC031072	3.83615			TC031072	4.33196			TC031072	3.45901			TC031072	3.95474							TC031061
TC031133	5.23948			TC031133	5.69233			TC031133	5.02361			TC031133	5.47643							TC031072
TC031150	3.55383			TC031150	2.39915			TC031150	3.72134			TC031150	2.56666							TC031133
TC031157	5.63052			TC031157	4.35701			TC031157	6.23667			TC031157	4.96314							TC031150
TC031194	2.41698			TC031194	2.48697			TC031194	2.06924			TC031194	2.13922							TC031157
TC031224	2.53121			TC031224	2.24875			TC031224	3.03126			TC031224	2.74883							TC031194
TC031245	4.98723			TC031245	2.60788			TC031245	5.5626			TC031245	3.18325							TC031224
TC031283	2.29678			TC031283	3.81343			TC031283	3.02566			TC031283	4.54232							TC031245
TC031335	2.94145			TC031335	2.60348			TC031335	3.49885			TC031335	3.16089							TC031283
TC031341	4.60578			TC031341	4.90281			TC031341	3.70102			TC031341	3.99802							TC031335
TC031398	2.30454			TC031398	2.28471			TC031398	2.32139			TC031398	2.30156							TC031341
TC031401	2.46073			TC031401	2.36608			TC031401	2.27175			TC031401	2.17703							TC031398
TC031402	3.2416			TC031402	3.22932			TC031402	3.05605			TC031402	3.04375							TC031401
TC031404	2.95799			TC031404	3.93196			TC031404	2.81649			TC031404	3.79042							TC031402
TC031414	3.48422			TC031414	2.90579			TC031414	4.08962			TC031414	3.51119							TC031404
TC031426	3.15093			TC031426	6.63748			TC031426	2.91369			TC031426	6.40025							TC031414
TC031427	3.02952			TC031427	5.19867			TC031427	3.02817			TC031427	5.19732							TC031426
TC031428	2.89073			TC031428	4.26631			TC031428	2.94582			TC031428	4.3214							TC031427
TC031442	3.90667			TC031442	2.48665			TC031442	4.09386			TC031442	2.67384							TC031428
TC031449	3.64478			TC031449	5.34213			TC031449	3.15418			TC031449	4.85154							TC031442
TC031485	4.00584			TC031485	2.28003			TC031485	4.54227			TC031485	2.81645							TC031449
TC031505	4.73344			TC031505	2.3822			TC031505	4.95419			TC031505	2.60291							TC031485
TC031511	4.74082			TC031511	3.41035			TC031511	5.18192			TC031511	3.85144							TC031505
TC031518	2.67338			TC031518	3.23934			TC031518	3.52834			TC031518	4.09431							TC031511
TC031524	3.15964			TC031524	3.50583			TC031524	3.36128			TC031524	3.70747							TC031518
TC031645	5.08069			TC031645	4.51146			TC031645	5.70017			TC031645	5.13094							TC031524
TC031677	3.27994			TC031677	4.93127			TC031677	2.76276			TC031677	4.41408							TC031645
TC031706	2.94682			TC031706	4.15487			TC031706	2.58302			TC031706	3.79103							TC031677
TC031770	3.89043			TC031770	2.98019			TC031770	3.98401			TC031770	3.07372							TC031706
TC031801	2.45033			TC031801	3.21027			TC031801	2.46702			TC031801	3.22696							TC031770
TC031805	3.10465			TC031805	3.30817			TC031805	2.66022			TC031805	2.8637							TC031801
TC031806	2.53448			TC031806	2.36596			TC031806	2.19128			TC031806	2.02271							TC031805
TC031807	2.3727			TC031807	2.86156			TC031807	2.11377			TC031807	2.60261							TC031806
TC032046	3.2734			TC032046	2.9786			TC032046	2.64077			TC032046	2.34593							TC031807
TC032049	2.50466			TC032049	3.5157			TC032049	3.01546			TC032049	4.02655							TC032046
TC032050	2.32837			TC032050	2.6239			TC032050	2.57318			TC032050	2.86872							TC032049
TC032051	2.44212			TC032051	3.52228			TC032051	2.53629			TC032051	3.61646							TC032050
TC032064	4.32422			TC032064	2.20229			TC032064	4.56726			TC032064	2.44527							TC032051
TC032093	2.2953			TC032093	2.15842			TC032093	2.63336			TC032093	2.49649							TC032064
TC032094	5.52306			TC032094	3.01555			TC032094	5.9836			TC032094	3.47609							TC032093
TC032110	4.6962			TC032110	3.89977			TC032110	5.60291			TC032110	4.80649							TC032094
TC032113	3.5886			TC032113	6.67712			TC032113	3.11741			TC032113	6.20592							TC032110
TC032123	2.7009			TC032123	2.30043			TC032123	2.87103			TC032123	2.47056							TC032113
TC032136	3.68999			TC032136	3.22722			TC032136	3.93653			TC032136	3.47373							TC032123
TC032161	2.71926			TC032161	4.49839			TC032161	2.68726			TC032161	4.46639							TC032136
TC032167	4.28878			TC032167	2.3328			TC032167	4.55526			TC032167	2.59925							TC032161
TC032197	4.65373			TC032197	3.32961			TC032197	5.13731			TC032197	3.81319							TC032167
TC032201	2.06577			TC032201	3.03632			TC032201	2.39906			TC032201	3.36965							TC032197
TC032223	3.60061			TC032223	2.24025			TC032223	3.92355			TC032223	2.56318							TC032201
TC032228	3.1013			TC032228	3.54215			TC032228	2.29387			TC032228	2.7347							TC032223
TC032229	5.28054			TC032229	6.07752			TC032229	4.554			TC032229	5.35087							TC032228
TC032230	2.90646			TC032230	5.49862			TC032230	2.61577			TC032230	5.20793							TC032229
TC032231	5.76575			TC032231	8.73429			TC032231	5.55865			TC032231	8.5272							TC032230
TC032254	4.23011			TC032254	5.01301			TC032254	4.94504			TC032254	5.72811							TC032231
TC032259	3.01872			TC032259	4.40154			TC032259	2.76187			TC032259	4.14468							TC032254
TC032260	2.50903			TC032260	5.32788			TC032260	2.25147			TC032260	5.07032							TC032259
TC032284	4.88507			TC032284	2.50615			TC032284	5.49336			TC032284	3.11443							TC032260
TC032285	3.93262			TC032285	2.20009			TC032285	3.93513			TC032285	2.20258							TC032284
TC032290	4.63698			TC032290	2.23711			TC032290	5.03948			TC032290	2.63961							TC032285
TC032295	2.6128			TC032295	4.40708			TC032295	2.02148			TC032295	3.8157							TC032290
TC032298	2.00709			TC032298	3.02032			TC032298	2.23375			TC032298	3.24699							TC032295
TC032337	4.03054			TC032337	2.88215			TC032337	4.24675			TC032337	3.09836							TC032298
TC032379	3.58761			TC032379	4.31414			TC032379	3.628			TC032379	4.35453							TC032337
TC032453	3.39303			TC032453	2.31034			TC032453	3.67486			TC032453	2.59217							TC032379
TC032503	2.48137			TC032503	2.91034			TC032503	2.35495			TC032503	2.7839							TC032453
TC032509	2.44114			TC032509	2.62193			TC032509	2.28712			TC032509	2.46791							TC032503
TC032531	3.65717			TC032531	2.12772			TC032531	3.80365			TC032531	2.27419							TC032509
TC032550	3.30174			TC032550	2.26585			TC032550	3.3617			TC032550	2.3258							TC032531
TC032565	4.05406			TC032565	3.64585			TC032565	4.7577			TC032565	4.34949							TC032550
TC032610	3.00162			TC032610	5.14019			TC032610	2.71987			TC032610	4.85843							TC032565
TC032692	3.15314			TC032692	5.20633			TC032692	2.84228			TC032692	4.89545							TC032610
TC032702	2.87661			TC032702	4.25227			TC032702	2.30984			TC032702	3.68546							TC032692
TC032705	4.82143			TC032705	3.40196			TC032705	5.31398			TC032705	3.89438							TC032702
TC032730	2.37974			TC032730	3.2812			TC032730	3.02475			TC032730	3.92621							TC032705
TC032741	2.89113			TC032741	2.0753			TC032741	2.99705			TC032741	2.1812							TC032730
TC032762	2.80865			TC032762	3.77788			TC032762	2.97299			TC032762	3.94222							TC032741
TC032782	4.15116			TC032782	2.50917			TC032782	4.23696			TC032782	2.59495							TC032762
TC032783	4.82433			TC032783	2.69037			TC032783	5.04577			TC032783	2.91161							TC032782
TC032785	4.18791			TC032785	2.70183			TC032785	4.61301			TC032785	3.12692							TC032783
TC032827	5.15981			TC032827	5.46315			TC032827	4.87963			TC032827	5.1827							TC032785
TC032833	2.8898			TC032833	4.06109			TC032833	3.36203			TC032833	4.53332							TC032827
TC032841	2.54704			TC032841	4.54835			TC032841	2.65054			TC032841	4.65188							TC032833
TC032844	2.00284			TC032844	2.1943			TC032844	2.54192			TC032844	2.73347							TC032841
TC032845	2.78304			TC032845	2.82136			TC032845	2.78468			TC032845	2.82298							TC032844
TC032847	5.85818			TC032847	2.46262			TC032847	6.08504			TC032847	2.68942							TC032845
TC032848	4.29543			TC032848	4.19011			TC032848	4.68008			TC032848	4.57476							TC032847
TC032849	4.04208			TC032849	3.98381			TC032849	5.08102			TC032849	5.02281							TC032848
TC032850	4.87164			TC032850	4.37815			TC032850	5.3886			TC032850	4.89509							TC032849
TC032851	6.42839			TC032851	6.83907			TC032851	6.9085			TC032851	7.31918							TC032850
TC032856	6.4032			TC032856	8.68401			TC032856	6.74947			TC032856	9.03027							TC032851
TC032857	5.28881			TC032857	6.75857			TC032857	5.51965			TC032857	6.98941							TC032856
TC032874	2.22966			TC032874	3.2699			TC032874	2.45563			TC032874	3.49588							TC032857
TC032876	3.45575			TC032876	5.37451			TC032876	3.60966			TC032876	5.52843							TC032874
TC032890	2.89016			TC032890	3.67087			TC032890	2.41427			TC032890	3.19487							TC032876
TC032904	3.18746			TC032904	6.05798			TC032904	2.78358			TC032904	5.6541							TC032890
TC032906	3.01916			TC032906	4.01871			TC032906	3.0758			TC032906	4.07535							TC032904
TC032915	2.22727			TC032915	2.34679			TC032915	3.07697			TC032915	3.1967							TC032906
TC032920	3.57749			TC032920	2.49485			TC032920	3.46733			TC032920	2.38456							TC032915
TC032935	4.47461			TC032935	2.69812			TC032935	4.45891			TC032935	2.68241							TC032920
TC032936	6.18731			TC032936	6.99043			TC032936	6.67786			TC032936	7.48097							TC032935
TC033000	5.1347			TC033000	2.29973			TC033000	5.26762			TC033000	2.43261							TC032936
TC033013	2.85353			TC033013	4.44635			TC033013	2.82658			TC033013	4.41939							TC033000
TC033024	3.55465			TC033024	3.07942			TC033024	4.47704			TC033024	4.00192							TC033013
TC033056	4.55524			TC033056	5.66887			TC033056	4.08564			TC033056	5.19927							TC033024
TC033085	2.98948			TC033085	3.87502			TC033085	2.60923			TC033085	3.49473							TC033056
TC033114	2.60123			TC033114	2.53687			TC033114	3.32504			TC033114	3.26075							TC033085
TC033115	2.22968			TC033115	3.1622			TC033115	2.83172			TC033115	3.76425							TC033114
TC033118	3.63659			TC033118	5.70321			TC033118	3.12799			TC033118	5.19459							TC033115
TC033142	3.60755			TC033142	5.92073			TC033142	3.64529			TC033142	5.95848							TC033118
TC033150	2.06388			TC033150	2.40361			TC033150	2.07256			TC033150	2.41229							TC033142
TC033158	3.33146			TC033158	2.19266			TC033158	3.4424			TC033158	2.30359							TC033150
TC033169	6.61863			TC033169	8.94563			TC033169	6.83512			TC033169	9.16212							TC033158
TC033170	6.53947			TC033170	9.15849			TC033170	7.0389			TC033170	9.65793							TC033169
TC033172	4.2807			TC033172	2.0164			TC033172	5.00732			TC033172	2.74302							TC033170
TC033185	3.08242			TC033185	2.24368			TC033185	2.89822			TC033185	2.05947							TC033172
TC033188	4.39473			TC033188	6.33662			TC033188	3.18852			TC033188	5.13034							TC033185
TC033206	4.32629			TC033206	2.68528			TC033206	4.68464			TC033206	3.04362							TC033188
TC033219	4.15266			TC033219	9.25231			TC033219	4.22285			TC033219	9.32271							TC033206
TC033225	4.32613			TC033225	2.00748			TC033225	4.73663			TC033225	2.41798							TC033219
TC033228	4.23214			TC033228	2.19202			TC033228	4.62534			TC033228	2.58522							TC033225
TC033231	5.02113			TC033231	2.7164			TC033231	5.17968			TC033231	2.87488							TC033228
TC033254	3.72613			TC033254	3.53211			TC033254	3.77935			TC033254	3.58533							TC033231
TC033296	3.5169			TC033296	2.83628			TC033296	3.78161			TC033296	3.10098							TC033254
TC033309	3.69469			TC033309	2.73523			TC033309	4.00807			TC033309	3.04861							TC033296
TC033316	2.21377			TC033316	2.30635			TC033316	2.22811			TC033316	2.32068							TC033309
TC033317	2.34377			TC033317	2.09541			TC033317	2.38357			TC033317	2.1352							TC033316
TC033332	2.53178			TC033332	2.2914			TC033332	2.88929			TC033332	2.64891							TC033317
TC033339	2.46726			TC033339	3.7299			TC033339	2.6408			TC033339	3.90345							TC033332
TC033347	2.25024			TC033347	2.94729			TC033347	2.04793			TC033347	2.74498							TC033339
TC033349	3.4723			TC033349	2.28767			TC033349	3.42741			TC033349	2.24278							TC033347
TC033366	2.9226			TC033366	4.16365			TC033366	2.23524			TC033366	3.47612							TC033349
TC033387	3.31022			TC033387	2.3953			TC033387	3.48858			TC033387	2.57366							TC033366
TC033400	2.66102			TC033400	4.28233			TC033400	3.74943			TC033400	5.37088							TC033387
TC033402	4.09651			TC033402	3.70467			TC033402	4.56962			TC033402	4.17779							TC033400
TC033404	3.09886			TC033404	5.15536			TC033404	2.94314			TC033404	4.99964							TC033402
TC033406	2.91326			TC033406	3.01447			TC033406	3.28505			TC033406	3.38627							TC033404
TC033442	3.69025			TC033442	4.66369			TC033442	3.38086			TC033442	4.35426							TC033406
TC033461	2.22211			TC033461	2.41871			TC033461	2.48403			TC033461	2.68064							TC033442
TC033466	4.59897			TC033466	5.83695			TC033466	4.81306			TC033466	6.05105							TC033461
TC033469	2.84514			TC033469	3.56768			TC033469	3.24678			TC033469	3.96931							TC033466
TC033547	3.09434			TC033547	2.7664			TC033547	2.8559			TC033547	2.52788							TC033469
TC033558	2.87951			TC033558	3.60238			TC033558	3.06859			TC033558	3.79146							TC033547
TC033571	3.69984			TC033571	4.87536			TC033571	2.56767			TC033571	3.74316							TC033558
TC033572	3.36342			TC033572	3.73345			TC033572	2.66025			TC033572	3.0301							TC033571
TC033582	3.73939			TC033582	4.38987			TC033582	4.25548			TC033582	4.90597							TC033572
TC033583	2.1837			TC033583	3.81825			TC033583	2.26286			TC033583	3.89743							TC033582
TC033596	2.47162			TC033596	4.31271			TC033596	2.83278			TC033596	4.67389							TC033583
TC033599	2.1874			TC033599	3.26757			TC033599	2.98542			TC033599	4.0656							TC033596
TC033626	3.3995			TC033626	4.70643			TC033626	3.1172			TC033626	4.42413							TC033599
TC033648	2.57314			TC033648	2.78525			TC033648	2.23067			TC033648	2.44276							TC033626
TC033688	3.24778			TC033688	3.06218			TC033688	2.84336			TC033688	2.65772							TC033648
TC033767	5.88866			TC033767	6.17979			TC033767	5.96245			TC033767	6.25357							TC033688
TC033809	7.15356			TC033809	6.35446			TC033809	7.80373			TC033809	7.00461							TC033767
TC033810	7.19975			TC033810	8.17701			TC033810	7.44532			TC033810	8.42257							TC033809
TC033811	5.26552			TC033811	2.04639			TC033811	5.8341			TC033811	2.61493							TC033810
TC033812	6.95465			TC033812	7.30039			TC033812	6.77351			TC033812	7.1192							TC033811
TC033822	4.16146			TC033822	7.10974			TC033822	3.23811			TC033822	6.18638							TC033812
TC033830	3.4395			TC033830	2.01086			TC033830	3.66615			TC033830	2.2375							TC033822
TC033846	2.78362			TC033846	3.13709			TC033846	2.31893			TC033846	2.67236							TC033830
TC033847	2.97611			TC033847	2.87628			TC033847	3.59855			TC033847	3.49874							TC033846
TC033863	2.56487			TC033863	2.62972			TC033863	2.74306			TC033863	2.80792							TC033847
TC033882	2.4935			TC033882	2.92864			TC033882	2.76049			TC033882	3.19563							TC033863
TC033896	3.628			TC033896	3.60819			TC033896	2.59136			TC033896	2.57149							TC033882
TC033932	2.45343			TC033932	3.3143			TC033932	2.52741			TC033932	3.38828							TC033896
TC033952	4.21628			TC033952	5.56453			TC033952	3.47222			TC033952	4.82047							TC033932
TC033977	4.86854			TC033977	2.05986			TC033977	5.13476			TC033977	2.32605							TC033952
TC033999	2.58857			TC033999	4.36299			TC033999	2.25069			TC033999	4.02509							TC033977
TC034001	5.48239			TC034001	2.19017			TC034001	6.18419			TC034001	2.89197							TC033999
TC034002	5.6732			TC034002	2.40433			TC034002	6.71704			TC034002	3.44817							TC034001
TC034010	4.58629			TC034010	2.15604			TC034010	4.62142			TC034010	2.19116							TC034002
TC034021	4.70383			TC034021	3.59881			TC034021	5.18378			TC034021	4.07874							TC034010
TC034028	2.09431			TC034028	2.76543			TC034028	2.36015			TC034028	3.03129							TC034021
TC034069	3.54806			TC034069	5.50753			TC034069	2.32234			TC034069	4.28162							TC034028
TC034073	3.18804			TC034073	4.52635			TC034073	2.56166			TC034073	3.89991							TC034069
TC034078	4.35484			TC034078	6.59078			TC034078	4.74357			TC034078	6.97953							TC034073
TC034082	2.80422			TC034082	2.98231			TC034082	3.67313			TC034082	3.85128							TC034078
TC034093	3.31598			TC034093	5.8899			TC034093	3.06879			TC034093	5.64271							TC034082
TC034096	3.21217			TC034096	4.46786			TC034096	3.58005			TC034096	4.8358							TC034093
TC034114	3.0205			TC034114	6.03324			TC034114	2.78041			TC034114	5.79316							TC034096
TC034127	2.14341			TC034127	2.67274			TC034127	3.17218			TC034127	3.70161							TC034114
TC034144	2.99976			TC034144	2.17087			TC034144	3.40627			TC034144	2.57741							TC034127
TC034147	3.36728			TC034147	4.78559			TC034147	2.64998			TC034147	4.06825							TC034144
TC034148	3.98764			TC034148	3.85965			TC034148	3.69762			TC034148	3.56954							TC034147
TC034188	3.30739			TC034188	3.83061			TC034188	2.97698			TC034188	3.50019							TC034148
TC034218	2.51264			TC034218	2.81272			TC034218	2.31918			TC034218	2.61922							TC034188
TC034240	2.73724			TC034240	3.4094			TC034240	3.19985			TC034240	3.87206							TC034218
TC034242	2.72624			TC034242	3.20241			TC034242	2.66019			TC034242	3.13635							TC034240
TC034243	4.81687			TC034243	2.24765			TC034243	4.87661			TC034243	2.30716							TC034242
TC034253	2.12995			TC034253	3.04159			TC034253	2.30882			TC034253	3.22047							TC034243
TC034285	3.40337			TC034285	5.61309			TC034285	3.55508			TC034285	5.76481							TC034253
TC034286	2.46294			TC034286	3.94082			TC034286	2.1547			TC034286	3.63257							TC034285
TC034303	2.89683			TC034303	2.99875			TC034303	2.94509			TC034303	3.047							TC034286
TC034323	2.4684			TC034323	3.91721			TC034323	2.3441			TC034323	3.79291							TC034303
TC034364	4.45491			TC034364	4.49488			TC034364	4.71792			TC034364	4.75786							TC034323
TC034375	4.77509			TC034375	4.86735			TC034375	4.98389			TC034375	5.07607							TC034364
TC034392	3.09209			TC034392	2.81003			TC034392	3.00972			TC034392	2.72764							TC034375
TC034420	3.13797			TC034420	3.31352			TC034420	2.83327			TC034420	3.00876							TC034392
TC034429	3.41504			TC034429	2.39505			TC034429	3.72579			TC034429	2.7058							TC034420
TC034445	6.13096			TC034445	4.215			TC034445	7.13555			TC034445	5.2194							TC034429
TC034446	3.6619			TC034446	2.30317			TC034446	3.98152			TC034446	2.62279							TC034445
TC034475	2.3015			TC034475	2.89773			TC034475	2.22657			TC034475	2.8228							TC034446
TC034486	3.11274			TC034486	3.81864			TC034486	3.34575			TC034486	4.05167							TC034475
TC034519	2.79462			TC034519	4.30711			TC034519	2.40474			TC034519	3.91721							TC034486
TC034599	2.94034			TC034599	5.47505			TC034599	2.31449			TC034599	4.84919							TC034519
TC034660	3.1362			TC034660	4.04355			TC034660	4.45465			TC034660	5.36227							TC034599
TC034670	3.34107			TC034670	4.18591			TC034670	3.17929			TC034670	4.02405							TC034660
TC034687	3.5535			TC034687	2.78005			TC034687	3.6121			TC034687	2.83864							TC034670
TC034688	3.22564			TC034688	5.75877			TC034688	2.46632			TC034688	4.99942							TC034687
TC034699	6.54515			TC034699	9.1832			TC034699	7.04461			TC034699	9.68266							TC034688
TC034720	2.32337			TC034720	4.39978			TC034720	2.81591			TC034720	4.89236							TC034699
TC034739	2.3674			TC034739	2.74083			TC034739	2.90962			TC034739	3.28304							TC034720
TC034740	3.44735			TC034740	3.18677			TC034740	4.69047			TC034740	4.42989							TC034739
TC034746	3.2268			TC034746	2.73045			TC034746	2.73082			TC034746	2.23439							TC034740
TC034771	3.58535			TC034771	3.44067			TC034771	4.29808			TC034771	4.15346							TC034746
TC034776	3.37495			TC034776	3.62499			TC034776	3.29409			TC034776	3.54411							TC034771
TC034813	2.714			TC034813	3.22555			TC034813	2.65194			TC034813	3.16347							TC034776
TC034829	3.19807			TC034829	3.25718			TC034829	2.9562			TC034829	3.01521							TC034813
TC034837	2.81474			TC034837	2.5945			TC034837	2.29754			TC034837	2.07725							TC034829
TC034839	4.64291			TC034839	6.56876			TC034839	5.17558			TC034839	7.10145							TC034837
TC034842	2.27284			TC034842	2.71			TC034842	2.94051			TC034842	3.37768							TC034839
TC034851	4.36872			TC034851	5.46952			TC034851	4.28091			TC034851	5.38169							TC034842
TC034858	2.52531			TC034858	2.68898			TC034858	2.85622			TC034858	3.01989							TC034851
TC034884	2.42101			TC034884	2.40789			TC034884	2.34447			TC034884	2.33134							TC034858
TC034889	3.61156			TC034889	2.17216			TC034889	3.8194			TC034889	2.37996							TC034884
TC034895	2.6037			TC034895	3.8834			TC034895	3.39279			TC034895	4.67264							TC034889
TC034906	2.02685			TC034906	3.0053			TC034906	2.14847			TC034906	3.12692							TC034895
																				TC034906
